1 **Assessing the impact of physicochemical parameters in the**  
2 **predictive capabilities of thermodynamics-based stoichiometric**  
3 **approaches under mesophilic and thermophilic conditions**

4

5 Claudio Tomi-Andrino<sup>1,2,3</sup>, Rupert Norman<sup>2</sup>, Thomas Millat<sup>2</sup>, Philippe Soucaille<sup>2,4,5,6</sup>,  
6 Klaus Winzer<sup>2</sup>, David A. Barrett<sup>1</sup>, John King<sup>3</sup>, Dong-Hyun Kim<sup>1</sup>

7

8 <sup>1</sup>Centre for Analytical Bioscience, Advanced Materials and Healthcare Technology Division,  
9 School of Pharmacy, University of Nottingham, Nottingham, United Kingdom.

10 <sup>2</sup>Nottingham BBSRC/EPSRC Synthetic Biology Research Centre (SBRC), School of Life  
11 Sciences, BioDiscovery Institute, University of Nottingham, Nottingham, United Kingdom.

12 <sup>3</sup>Nottingham BBSRC/EPSRC Synthetic Biology Research Centre (SBRC), School of  
13 Mathematical Sciences, University of Nottingham, Nottingham, United Kingdom.

14 <sup>4</sup>INSA, UPS, INP, Toulouse Biotechnology Institute, (TBI), Université de Toulouse, Toulouse,  
15 France.

16 <sup>5</sup>INRA, UMR792, Toulouse, France.

17 <sup>6</sup>CNRS, UMR5504, Toulouse, France.

18

19

20 \*Corresponding author

21 Email: [dong-hyun.kim@nottingham.ac.uk](mailto:dong-hyun.kim@nottingham.ac.uk)

22

## 23 **Abstract**

24 Metabolic engineering in the post-genomic era is characterised by the development of new  
25 methods for metabolomics and fluxomics, supported by the integration of genetic engineering  
26 tools and mathematical modelling. Particularly, constraint-based stoichiometric models have  
27 been widely studied: (i) flux balance analysis (FBA) (*in silico*), and (ii) metabolic flux analysis  
28 (MFA) (*in vivo*). Recent studies have enabled the incorporation of thermodynamics and  
29 metabolomics data to improve the predictive capabilities of these approaches. However, an  
30 in-depth comparison and evaluation of these methods is lacking. This study presents a thorough  
31 analysis of four different *in silico* methods tested against experimental data (metabolomics and  
32 <sup>13</sup>C-MFA) for the mesophile *Escherichia coli* and the thermophile *Thermus thermophilus*. In  
33 particular, a modified version of the recently published matTFA toolbox has been created,  
34 providing a broader range of physicochemical parameters. In addition, a max-min driving force  
35 approach (as implemented in eQuilibrator) was also performed in order to compare the  
36 predictive capabilities of both methods.

37 Validating against experimental data allowed the determination of the best  
38 physicochemical parameters to perform the TFA for *E. coli*, whereas the lack of metabolomics  
39 data for *T. thermophilus* prevented from a full analysis. Results showed that analytical  
40 conditions predicting reliable flux distributions (similar to the *in vivo* fluxes) do not necessarily  
41 provide a good depiction of the experimental metabolomics landscape, and that the original  
42 matTFA toolbox can be improved. An analysis of flux pattern changes in the central carbon  
43 metabolism between <sup>13</sup>C-MFA and TFA highlighted the limited capabilities of both approaches  
44 for elucidating the anaplerotic fluxes. Finally, this study highlights the need for standardisation  
45 in the fluxomics community: novel approaches are frequently released but a thorough  
46 comparison with currently accepted methods is not always performed.

## 47 **Keywords**

48 Constraint-based modelling, fluxomics, metabolomics, thermodynamics.

## 49 **Author summary**

50 Biotechnology has benefitted from the development of high throughput methods characterising  
51 living systems at different levels (e.g. concerning genes or proteins), allowing the industrial  
52 production of chemical commodities (such as ethylene). Recently, focus has been put on  
53 determining reaction rates (or metabolic fluxes) in the metabolic network of certain  
54 microorganisms, in order to identify bottlenecks hindering their exploitation. Two main  
55 approaches can be highlighted, termed metabolic flux analysis (MFA) and flux balance analysis  
56 (FBA), based on measuring and estimating fluxes, respectively. While the influence of  
57 thermodynamics in living systems was accepted several decades ago, its application to study  
58 biochemical networks has been only recently enabled. In this sense, a multitude of different  
59 approaches constraining well-established modelling methods with thermodynamics has been  
60 suggested. However, physicochemical parameters are not properly adjusted to the experimental  
61 conditions, which might affect their predictive capabilities. In this study, we improved the  
62 reliability of currently available tools by exploring the impact of varying said parameters in the  
63 simulation of metabolic fluxes and metabolite concentration values. Additionally, our in-depth  
64 analysis allowed us to highlight limitations and potential solutions that should be considered in  
65 future studies.

66

## 67 **Introduction**

68 Metabolic engineering aims to improve microbial strains by considering comprehensive  
69 metabolic pathways in their entirety rather than overexpressing a single gene (1). To improve  
70 the strains, hypothesis-driven studies have attempted to rationally identify gene targets and to  
71 evaluate the effects of those changes in the network (2, 3). However, the complex nature of  
72 cellular metabolism and its regulation demands a holistic understanding, i.e. a data-driven  
73 approach (1-3). Combining metabolic engineering with systems biology and mathematical  
74 modelling allows for an optimisation of entire cellular networks considering further  
75 downstream processes at early stages (4).

76 This systematic framework exploits information regarding the metabolic state, which  
77 comprises the metabolome (set of low-molecular-weight metabolites (<1.5 kDa)) and the  
78 fluxome (or metabolic activity, distribution of rates of conversion/transport in the metabolic  
79 network) (5, 6). Kinetic modelling can yield metabolic fluxes from metabolomics data, but lack  
80 of high-quality enzymatic parameters and computational limitations (e.g. time-consuming  
81 processes) hinder its application (7-9). As an alternative, stoichiometric modelling provides a  
82 flux distribution without any kinetic or metabolomics information (10). Briefly, a metabolic  
83 (quasi) steady-state for intracellular concentration values ( $C$ ) is assumed, so the stoichiometric  
84 matrix ( $S$ ) (including the stoichiometric coefficients of metabolites in each reaction of the  
85 metabolic network) constrains the set of metabolic fluxes ( $v$ ) (11):

$$\frac{dC}{dt} = S \times v \cong 0 \quad (1)$$

86 Two main approaches to solve this equation can be found: (i) flux balance analysis  
87 (FBA), normally applied to large models (genome-scale model, GSM) (12) or (ii) metabolic  
88 flux analysis (MFA), used for smaller metabolic networks (mainly the central carbon  
89 metabolism) (Table 1).

90 FBA solves the underdetermined system represented in Eq. 1 by maximising or  
91 minimising the value of an assumed objective function (12). A plethora of different objectives  
92 has been described in the literature (13). Three can be highlighted: maximisation of biomass  
93 yield ( $Y_{X/S}$ ), maximisation of ATP yield, and minimisation of sum of fluxes, which have been  
94 suggested to compete in the regulation of bacterial metabolism (14). Hence, selecting an  
95 adequate one/multi-dimensional objective function when analysing a GSM will depend on the  
96 growth conditions to be simulated in FBA. In general, measured extracellular metabolic rates

97 (e.g. substrate uptake) are insufficient to properly describe the intracellular metabolic fluxes  
98 (11). In contrast, MFA is based on a least-squares-regression problem, normally solved by  
99 exploiting experimental mass isotopomer distribution (MID) of proteinogenic amino acids  
100 (<sup>13</sup>C-MFA) (11). Since this approach requires fewer assumptions and uses more experimental  
101 information than FBA, <sup>13</sup>C-MFA is considered to be the *gold standard* in fluxomics (15).  
102 However, current applicability (central carbon metabolism), and technical/computational  
103 complexity (particularly for autotrophic growth (16)) limit its usage.

104 The set of constraints characterising stoichiometric modelling approaches (Eq. 1) is  
105 insufficient to guarantee thermodynamically feasible results in the flux solution space (17, 18).  
106 Both FBA and <sup>13</sup>C-MFA assume most reactions to be reversible (11, 19): in the first case  
107 directionalities are dictated by the optimal flux distribution (which depends on the *a priori*  
108 chosen objective function (12)), whereas in <sup>13</sup>C-MFA they are determined by the MIDs (20).  
109 The flux-force relationship (thermodynamic displacement from the equilibrium (21)) links  
110 thermodynamic potentials and fluxes (Eq. 2):

$$\Delta_r G' = \Delta_r G^{o'} + RT \ln Q = RT \ln(Q/k_{eq}) = -RT \ln(J^+/J^-) \quad (2)$$

111 where  $\Delta_r G'$  and  $\Delta_r G^{o'}$  are the Gibbs free energies of reactions (the latter referring to adjusted  
112 standard conditions),  $Q$  and  $k_{eq}$  are the ratio of products to reactant concentrations or activities  
113 (the latter at equilibrium) and  $(J^+/J^-)$  is the relative forward-to-backward flux (20).

114 Four main approaches exploiting thermodynamics data can be highlighted: (i) energy  
115 balance analysis (EBA), where pre-selecting  $\Delta_r G'$  bounds leads to biased results (22),  
116 (ii) network-embedded thermodynamic (NET) analysis, that needs pre-assigned  
117 directionalities (e.g. obtained by FBA) and evaluates the thermodynamic consistency (23),  
118 (iii) max-min driving force (MDF), which needs a flux distribution as input data to predict  
119 metabolite concentration values (24), and (iv) thermodynamically-constrained FBA. Two  
120 methods can be found within the latter: thermodynamics-based flux analysis (TFA), and an  
121 optimization problem allowing to obtain a thermodynamically realizable flux-minimised  
122 (TR-fluxmin) solution. TFA directly yields a thermodynamically feasible FBA solution (e.g.  
123 by maximising  $Y_{X/S}$ ) and simulated metabolomics data (18, 25). In contrast, TR-fluxmin is  
124 based on the minimisation of sum of fluxes in the system whilst applying a penalty score for  
125 *in silico* metabolite concentration values (19). Other recent approaches are based on alternative  
126 constraints, such as setting an upper limit on the Gibbs energy dissipation rate (26).

127           MDF and TFA are generally performed using eQuilibrator (24) and matTFA (18),  
 128 respectively. Given the code availability for both tools, they were selected for this study. Three  
 129 features from both methods should be highlighted: (i) unique values for temperature (25 °C)  
 130 are considered, (ii) salinity is not taken into account, and (iii) Gibbs free energy values are  
 131 adjusted for ionic strength ( $I$ ) using the extended Debye-Hückel equation (Table 1). In this  
 132 sense, it should be noted that the cytosol of *E. coli* is normally in the interval 0.15 – 0.20 M  
 133 (25) (and so, salinity is not null), and the fact that the extended Debye-Hückel equation is valid  
 134 for  $I < 0.1$  M (27). Previous attempts to adjust physicochemical parameters to *in vivo*  
 135 conditions can be found in the literature, but they require extra assumptions and only provide  
 136 information regarding reaction directionalities (28).

137 **Table 1. Comparison of frequently used approaches in fluxomics.**

|                                                       | <sup>13</sup> C-MFA             | FBA        | MDF                               | TFA                               |
|-------------------------------------------------------|---------------------------------|------------|-----------------------------------|-----------------------------------|
| Metabolic network size                                | small                           | GSM        | GSM                               | GSM                               |
| Flux distribution                                     | generated                       | generated  | input                             | generated                         |
| Uptake rate                                           | Yes                             | Yes        | -                                 | Yes                               |
| Specific growth rate, $\mu$ (h <sup>-1</sup> )        | -                               | Yes        | -                                 | Yes                               |
| Gibbs free energy of formation ( $\Delta G_f^\circ$ ) | -                               | -          | Experimental (29),<br>or CCM (30) | Experimental (29),<br>or GCM (31) |
| Temperature, $t$ (°C)                                 | -                               | -          | 25                                |                                   |
| Ionic strength, $I$ (M)                               | -                               | -          | input                             | 0.25                              |
| Salinity, $S$ (g/kg)                                  | -                               | -          | -                                 | -                                 |
| Adjustment method                                     | -                               | -          | Extended Debye-Hückel             |                                   |
| Parameter $A$                                         | -                               | -          | T-dependent                       |                                   |
| Metabolite concentration values                       | -                               | -          | Constraint or predicted           |                                   |
| Problem formulation                                   | least square<br>regression (11) | LP<br>(12) | LP<br>(24)                        | MILP<br>(18)                      |

138 <sup>13</sup>C-MFA, <sup>13</sup>C metabolic flux analysis; CCM, component contribution method; FBA, flux balance analysis;  
 139 GCM, group contribution method; GSM, genome-scale model; LP, linear programming; MDF, max-min driving  
 140 force; MILP, mixed-integer linear programming; TFA, thermodynamics-based flux analysis.

141           This study was based on determining the impact of varying and adjusting the  
 142 physicochemical parameters ( $t$ ,  $I$  and  $S$ ) on the predictive capabilities of thermodynamic-based  
 143 fluxomics/metabolomics approaches under mesophilic and thermophilic growth conditions. In  
 144 order to do so, a modified matTFA was developed by increasing the number of parameters and  
 145 parameter values that were originally considered (18). To validate the results, a comparison  
 146 with published <sup>13</sup>C-MFA and metabolomics data was performed.

147           Finally, flux pattern changes between *in vivo* and *in silico* fluxes in the central carbon  
 148 metabolism were analysed, with a particular focus on the anaplerotic reactions. Intermediates

149 participating in the tricarboxylic acid (TCA) cycle are used for biosynthesis of amino acids  
150 (which is robust against changes in concentrations (32, 33)), so a continuous replenishment by  
151 anaplerosis is necessary (34). The ‘anaplerotic node’ consists of carboxylation/decarboxylation  
152 reactions including phosphoenolpyruvate, pyruvate, oxaloacetate, and malate (35). Given the  
153 fact similar MIDs (from proteinogenic amino acids) can be obtained from different precursors,  
154 <sup>13</sup>C-MFA has been noted to show a limited capability to elucidate fluxes around the anaplerotic  
155 node (32, 36, 37). An approach improving the resolution consisting in also measuring MIDs  
156 from intracellular intermediates has been suggested (32), but it is not commonly performed  
157 (11). Hence, <sup>13</sup>C-MFA data for *E. coli* and *T. thermophilus* (38, 39) was assumed as the *gold*  
158 *standard* in this study, as stated above (15).

## 159 **Materials and Methods**

### 160 **Metabolic network, mapping of metabolic fluxes and experimental data**

161 Two growth conditions (mesophilic and thermophilic) represented by two species were  
162 selected: *Escherichia coli*, widely used in biotechnology, and *Thermus thermophilus*, an  
163 extreme thermophile with the potential to become a non-model metabolic engineering platform  
164 (40). For *E. coli*, simulations were performed with the commonly used GSM *iJO1366*  
165 (str. K-12 substr. MG1655), as available in BiGG Models (41). This model has proven to  
166 predict phenotypes in a wide range of growth conditions (42), and was explored with the  
167 original matTFA (18). In the case of *T. thermophilus*, the GSM *iTT548* for the strain HB27  
168 was used (43), downloaded from (<http://darwin.di.uminho.pt/models/models>). The metabolic  
169 networks were mapped on to previously published <sup>13</sup>C-MFA data (S1-S2 Tables). For the sake  
170 of consistency, metabolomics and fluxomics data were obtained from the same experiment  
171 when possible (Table 2).

172 **Table 2. Bioprocessing, metabolomics and fluxomics (<sup>13</sup>C-MFA) experimental data.**

|                                         | <i>Escherichia coli</i> K-12 | <i>Thermus thermophilus</i> HB8 |
|-----------------------------------------|------------------------------|---------------------------------|
| Glucose uptake rate (mmol/gDCW-h)       | 2.93                         | 3.7                             |
| Specific growth rate (h <sup>-1</sup> ) | 0.20                         | 0.22 ± 0.02                     |
| $Y_{XS}$ (gDCW/g)                       | 0.38                         | 0.33 ± 0.02                     |
| Temperature (°C)                        | 37                           | 72                              |
| Metabolomics                            | Yes (S2 Dataset)             | -                               |
| Fluxomics ( <sup>13</sup> C-MFA)        | Yes (S1 Table)               | Yes (S2 Table)                  |
| Ref.                                    | (18, 38)                     | (39)                            |

173 It is important to note that for *E. coli* the same strain was used for both the GSM and the <sup>13</sup>C-MFA, whereas for  
174 *T. thermophilus* strain HB27 was used for constructing the GSM, and HB8 for the <sup>13</sup>C-MFA. The *E. coli* cells  
175 were grown in glucose-limited chemostats, whereas batch culture was used for *T. thermophilus* instead. GAM,  
176 growth-associated maintenance; NGAM, non-growth-associated maintenance;  $Y_{XS}$ , biomass yield.

177  
178 TFA required a higher glucose uptake rate than the experimental one (S1 Appendix),  
179 which provoked a difference between predicted and experimental growth rate (which is equal  
180 to the dilution rate in a continuous culture). Since the biomass elemental composition does not  
181 significantly vary due to changes in the dilution rate (44), biomass reactions remained  
182 unchanged in the model (45), and the energetic requirements were assumed to be constant for  
183 both bacteria (S1 Appendix). Using the default constraints from the metabolic networks also  
184 allowed comparing the results with previously published ones.

185 In order to achieve compatibility with the COBRA toolbox (46) and matTFA (18), some  
186 changes were applied to GSM *iTT548*: (i) the names of the metabolites were adapted to the



187 convention used in matTFA and associated to *metSEED\_IDs* to enable access to the  
 188 thermodynamics database in matTFA (S1 Dataset) (18), and (ii) the fields *CompartmentData*,  
 189 *metCompSymbol* and *rev* were created in the model.

190

### 191 **Modified matTFA (mod-matTFA) and parameters included in the analysis**

192 The original matTFA toolbox uses unique values for *t* and *I* (18), and *S* is not taken into account  
 193 (Table 1). To address this potential deficiency, a modified matTFA was created (mod-matTFA)  
 194 as described below (Table 3). For reproducibility (47), the complete list of files used in this  
 195 study was collected in S3 Table.

196 **Table 3. Parameters considered in mod-matTFA.**

| Parameters                      | Mesophilic conditions<br>( <i>E. coli</i> )                 | Thermophilic conditions<br>( <i>T. thermophilus</i> )       |
|---------------------------------|-------------------------------------------------------------|-------------------------------------------------------------|
| Temperature, <i>t</i> (°C)      | (0): 25<br>(1): 37                                          | (0): 25<br>(1): 72                                          |
| Ionic strength, <i>I</i> (M)    | (0): 0<br>(1): 0.25                                         | (0): 0.25<br>(1): 0.50                                      |
| Salinity, <i>S</i> (g/kg)       | (0): 0<br>(1): 13.74                                        | (0): 13.74<br>(1): 27.10                                    |
| Adjustment method               | (0): Extended Debye-Hückel equation<br>(1): Davies equation | (0): Extended Debye-Hückel equation<br>(1): Davies equation |
| Parameter <i>A</i>              | (0): T-dependent<br>(1): T,S-dependent                      | (0): T-dependent<br>(1): T,S-dependent                      |
| Metabolite concentration values | (0): Default matTFA<br>(1): experimental data               | (0): Default matTFA<br>(1): -                               |

197 Values 0/1 refer to the binary codification for the full factorial design (S4-S5 Tables). It is important to note that  
 198 in the case of *E. coli*, 2<sup>6</sup> combinations were tested, whereas the lack of metabolomics data for *T. thermophilus*  
 199 meant only 2<sup>5</sup> different tests were available. There is a ‘default matTFA’ constraint regarding set concentrations  
 200 values for cofactors (AMP, ADP and ATP) as included in the original matTFA code. ‘Experimental data’ refers  
 201 to the use of published metabolomics data (S2 Dataset), setting the lower and upper bound for the simulation as  
 202 90-110% of the concentration values.

203

204 Since *I* affects the Gibbs energy of formation, an adjustment from the reference state ( $\Delta_f G_j^0$ )  
 205  $G_j^0$ ) was needed to obtain the standard transformed Gibbs energy of formation ( $\Delta_f G_j^{\prime 0}$ ) (29). In  
 206 the original matTFA (18) and other studies (24, 26) the extended Debye-Hückel equation was  
 207 used to adjust the Gibbs free energy values, with a proven validity for  $I < 0.1$  M (27) (Eq. 3).  
 208 The parameter *B* was assumed to be constant, with a value of 1.6 mol<sup>-1/2</sup>L<sup>1/2</sup> (25, 29).  
 209 Mod-matTFA also explored the impact of using the Davies equation ( $\beta = 0.3$ ) (Eq. 4) as an  
 210 alternative adjustment approach, with a tested validity for  $I < 0.5$  M (27).

$$\Delta_f G_j^{\prime 0}(I) = \Delta_f G_j^{\circ} + N_H(j)RT \ln (10) \text{pH} - RT \left( \frac{A\sqrt{I}}{1 + B\sqrt{I}} \right) (z_j^2 - N_H(j)) \quad (3)$$

$$\Delta_f G_j^{\prime 0}(I) = \Delta_f G_j^{\circ} + N_H(j)RT \ln (10) \text{pH} - RT \left( \frac{A\sqrt{I}}{1 + \sqrt{I}} - \beta I \right) (z_j^2 - N_H(j)) \quad (4)$$

211 Both formulas include terms correcting the pH and  $I$ , where  $N_H(j)$  is the number of  
 212 hydrogen atoms in species  $j$ ,  $R$  is the gas constant,  $T$  is the absolute temperature and  $z_j$  refers  
 213 to the charge of the species (29). Applying the Gibbs-Helmholtz equation would be necessary  
 214 to account for temperature different from standard conditions, i.e. 25 °C, but the lack of  
 215 measured changes in enthalpy ( $\Delta H^{\circ}$ ) for all the metabolites prevents from doing so (48). Hence,  
 216 variations from 25 °C to 37 °C or to 72 °C were assumed to be small, as shown elsewhere (49).  
 217 The parameter  $A$  is normally assumed to be constant (25) or calculated using a  
 218 temperature-dependent function (Eq. 5) (18, 24), and the impact of using a  
 219 temperature/salinity-dependent function (Eq. 6) (48) was also tested in this study (Fig. 1).

$$A \text{ (mol}^{-1/2}\text{kg}^{1/2}\text{)} = 1.10708 - 1.54508 \times 10^{-3}T + 5.95584 \times 10^{-6}T^2 \quad (5)$$

$$A \text{ (mol}^{-1/2}\text{kg}^{1/2}\text{)} = \frac{F^3 \sqrt{2\varepsilon_0 R^3}}{4\pi\varepsilon_0 N_A} \times \left( \frac{\rho_{sw}(t,S)}{(\varepsilon_{sw}(t,S)T)^3} \right)^{1/2} \quad (6)$$

220 where the first term includes physical constants (Faraday's constant ( $F$ ), vacuum permittivity  
 221 ( $\varepsilon_0$ ), gas constant ( $R$ ) and Avogadro's number ( $N_A$ )), and the second the temperature (both in  
 222 K,  $T$ , and in °C,  $t$ ), and salinity ( $S$ ) dependent functions to calculate the density ( $\rho_{sw}$ ) (50) and  
 223 the relative permittivity ( $\varepsilon_{sw}$ ) (51) for seawater (S3 Table). It should be noted that the function  
 224 to calculate the density for seawater like solutions was used for the thermophile ( $t = 72$  °C)  
 225 beyond the limit of applicability ( $t < 40$  °C).

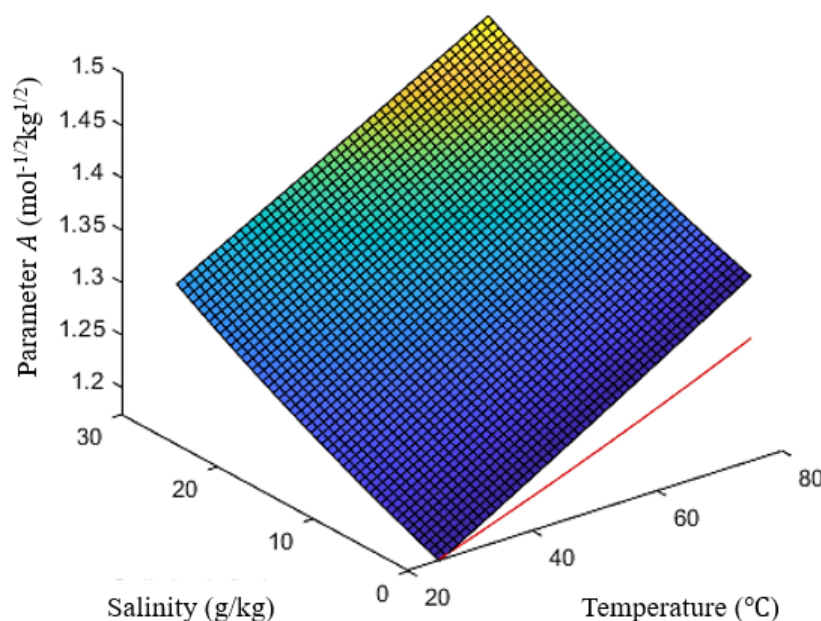

226

227 **Fig. 1. Calculation of the parameter A.** The red line refers to the temperature-dependent function (Eq. 5),  
228 whereas the surface is the temperature/salinity-dependent function (Eq. 6).

229 In general, consistency in units between parameters  $A$  (mol<sup>-1/2</sup>kg<sup>1/2</sup>) and  $B$  (mol<sup>-1/2</sup>L<sup>1/2</sup>)  
230 is achieved by assuming 1 kg = 1 L. In this study, an expression for seawater (Eq. 7) (52) was  
231 used to estimate a salinity value by considering a buoyant density ( $\rho$ ) for bacterial cells of  
232 1.11 kg/L (53). For  $I$ , values of 0.25 M (upper level for *E. coli*) (18) and 0.50 M (upper level  
233 for *T. thermophilus*) were used (Table 3).

$$I(\text{M}) \times \rho(\text{kg/L}) = \frac{19.92 \times S}{1000 - 1.005 \times S} \quad (7)$$

### 234 Assessment of fluxomics and metabolomics predictive capabilities

235 Two different growth conditions (mesophilic and thermophilic) were analysed using two  
236 bacteria (*E. coli* and *T. thermophilus*), respectively. Mod-matTFA was allowed to consider a  
237 broader range of parameters: 6 for *E. coli* and 5 for *T. thermophilus*, which yielded 64 and 32  
238 different combinations of parameter levels (Table 3). Constraints regarding substrate uptake  
239 rate, specific growth rate and energetic requirements were applied as explained in S1 Appendix,  
240 and maximisation of  $Y_{X/S}$  was selected as objective function. It is important to note that lower  
241 and upper boundaries for uptake rates for other macronutrients (such as O<sub>2</sub>) were applied as  
242 originally constrained in the metabolic networks. To compare the *in silico* fluxes from FBA  
243 and TFA with *in vivo* <sup>13</sup>C-MFA values (or estimated and experimental metabolite concentration  
244 values), a goodness-of-fit analysis based on the Pearson correlation coefficient ( $r$ ) was  
245 performed, as shown in (54). In particular, MATLAB's in-built *corrcoef* function was used.

246 In the mesophilic case (*E. coli*), the 64 tests were ranked according to two criteria:  
247 (i) correlation coefficient at the fluxomics level, and (ii) correlation coefficient at the  
248 metabolomics level. In order to assess the concordance of the results, the non-parametric  
249 Kendall's *W* statistics was performed (S3 Table), where a value of 0 means no agreement of  
250 ranking position with respect to each criterion, and a value of 1 indicates total agreement. In  
251 contrast to the parametric equivalent (Spearman's rank correlation coefficient), Kendall's *W*  
252 accounts for tied ranks (55). Finally, a joint ranking after weighting the ranking position  
253 according to each criterion was considered (the higher the score, the better the correlation in  
254 both the fluxomics and metabolomics levels).

255

### 256 Prediction of metabolite concentration values with an MDF-based approach (*E. coli*)

257 Two main distinctions between matTFA and eQuilibrator can be highlighted: (i) the necessity  
258 of a flux distribution as input in the latter (24), and (ii) the definition of the problem, which  
259 focuses on the MDF framework (24) (Table 1). In this study, the predicted flux distributions  
260 from FBA and TFA were analysed using an in-house MDF script based on the eQuilibrator API  
261 (Fig. 2), as explained in S2 Appendix. Since metabolites were needed to be named and  
262 identified after the Kyoto Encyclopedia of Genes and Genomes (KEGG) (56), a conversion  
263 from the GSM *iJO1366* (42) was performed by using The Chemical Translation Service (57),  
264 followed by a manual curation (S3 Dataset).

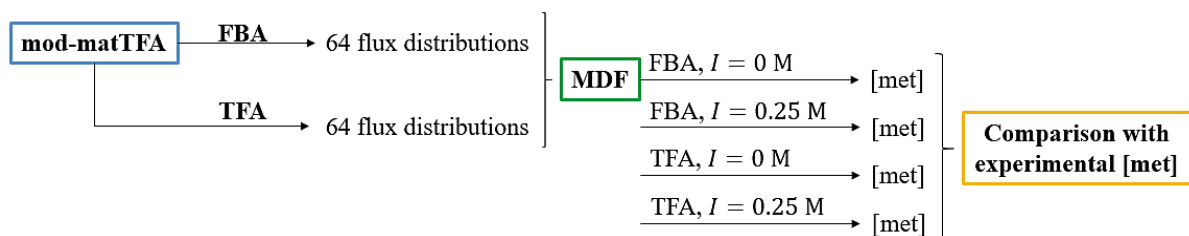

265

266 **Fig. 2. Workflow to analyse the predictive capabilities of the MDF-based approach.** pH = 7 in all cases. [met],  
267 metabolite concentration values.

268

## 269 **Results**

270 In this study three questions were addressed: (i) how good available thermodynamic-based  
271 approaches in predicting metabolic fluxes and metabolite concentrations values are, (ii)  
272 whether there is room for improvement by widening the range of physicochemical parameters  
273 that are taken into account, and (iii) how reliable the predicted fluxes in the anaplerotic node  
274 are.

275 To tackle these problems, the published matTFA (18) toolbox was modified as shown  
276 in S3 Table to include more parameters and a broader range of parameters (Table 3). Two  
277 growth conditions represented by two species were selected: *E. coli*, as a widely used organism  
278 in biotechnology (mesophile) and *T. thermophilus*, a potential non-model metabolic  
279 engineering platform (thermophile). The metabolic network for *E. coli* provided with the  
280 original toolbox was used, whereas modifications were necessary to adapt the published GSM  
281 for *T. thermophilus* (43). FBA and TFA analysis were performed (64 tests for *E. coli* and 32  
282 for *T. thermophilus*), by assuming maximisation of biomass yield as the objective function.  
283 Results were tested against available experimental data (<sup>13</sup>C-MFA (38, 39) and metabolomics  
284 (38)) by calculating the Pearson correlation coefficient, and Kendall's W to determine the  
285 agreement between criteria (only for *E. coli*). In addition, a MDF approach was tested against  
286 experimental metabolomics data to assess its predictive capabilities in comparison with  
287 mod-matTFA. Finally, flux pattern changes between *in vivo* and *in silico* fluxes in the  
288 anaplerotic node were compared to identify potential limitations in the predictive capabilities.

289

### 290 **Simulation of metabolic fluxes and metabolite concentration values under mesophilic** 291 **growth conditions (*E. coli*)**

292 The widely used GSM *iJO1366* (42) was selected for the mod-matTFA analysis, and results  
293 were compared with experimental data (metabolomics, fluxomics and bioprocessing data)  
294 (Table 2) to evaluate the predictive capabilities of mod-matTFA (S4 Dataset). Particularly, 6  
295 parameters with 2 levels each were tested (Table 3), yielding 64 runs (Fig. 3).

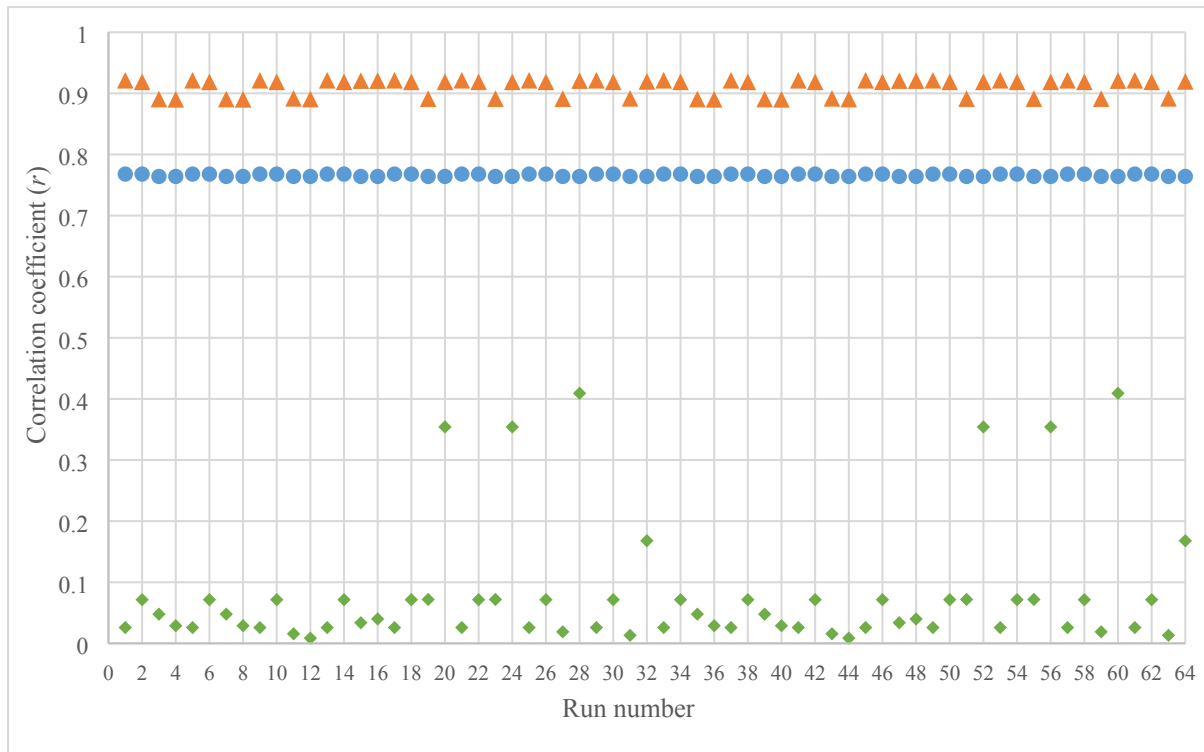

296

297 **Fig. 3. Goodness-of-fit analysis for predicted flux distributions under mesophilic growth conditions.**  
298 ● = FBA (after fixing directionalities) against  $^{13}\text{C}$ -MFA, ▲ = TFA against  $^{13}\text{C}$ -MFA, ◆ = simulated metabolite  
299 concentrations values against experimental. Run #3 recreates the analytical conditions as performed in the original  
300 matTFA toolbox.

301 Correlation coefficients for FBA in all runs were  $r \approx 0.76$ . For TFA, values were either  
302  $r \approx 0.91$  or  $r \approx 0.89$ , where the latter never happened when  $I = 0$  M. Metabolite concentration  
303 values range in the interval  $0 < r < 0.42$ . Due to the mismatch between experimental and  
304 modelling conditions,  $v_{\text{glucose uptake}}$  had to be set at a value higher than uptake rate (8.16  
305 instead of 2.93 mmol/gDCW-h), as explained in S1 Appendix. Regarding  $\mu$ , it was higher than  
306 the experimental value for FBA and TFA (0.69 and 0.80  $\text{h}^{-1}$  versus 0.20  $\text{h}^{-1}$ ). Hence, the  
307 predicted  $Y_{X/S}$  values were 0.47 and 0.55 g DCW/g glucose respectively, which differ from the  
308 experimental yield (0.38 g DCW/g glucose). For *E. coli*, a  
309  $Y_{X/S}^{\text{max}} = 0.54$  C-mol glucose/C-mol biomass (0.48 g DCW/g glucose, assuming 70% of water  
310 content (58)) has been suggested (59), which is not far from the predicted values. It should be  
311 noted that the FBA was performed after fixing directionalities and considering some  
312 thermodynamic constraints (18), rather than a traditional FBA (12).

313 The concordance analysis retrieved a Kendall's  $W \approx 0.43$ , showing that a high  
314 correlation between experimental and simulated metabolic fluxes did not necessarily mean a  
315 high correlation between experimental and simulated metabolite concentration values. In order

316 to identify the run with the best predictive capability at both levels, a joint ranking was  
 317 performed (Table 5).

318 **Table 5. Runs with the highest score in the joint ranking.**

|                                                                                     |      |    |      |    |    |    |      |    |      |    |      |    |      |
|-------------------------------------------------------------------------------------|------|----|------|----|----|----|------|----|------|----|------|----|------|
| Rank sum                                                                            | 63.5 |    | 60.5 |    |    |    | 57.5 |    | 55.5 |    | 53.5 |    | 14.5 |
| Correlation coefficient<br>TFA vs. <sup>13</sup> C-MFA                              | 0.92 |    | 0.92 |    |    |    | 0.92 |    | 0.92 |    | 0.92 |    | 0.89 |
| Correlation coefficient metabolomics                                                | 0.41 |    | 0.35 |    |    |    | 0.17 |    | 0.04 |    | 0.03 |    | 0.05 |
| Run number                                                                          | 28   | 60 | 20   | 24 | 52 | 56 | 32   | 64 | 16   | 48 | 15   | 47 | 3*   |
| <i>t</i> (°C)<br>(0 = 25, 1 = 37)                                                   | 1    | 1  | 1    | 1  | 1  | 1  | 1    | 1  | 1    | 1  | 0    | 0  | 0    |
| <i>I</i> (M)<br>(0 = 0, 1 = 0.25)                                                   | 1    | 1  | 1    | 1  | 1  | 1  | 1    | 1  | 1    | 1  | 1    | 1  | 1    |
| <i>S</i> (g/kg)<br>(0 = 0, 1 = 13.74)                                               | 0    | 0  | 0    | 1  | 0  | 1  | 1    | 1  | 1    | 1  | 1    | 1  | 0    |
| Parameter <i>A</i><br>(0 = <i>t</i> -dependent, 1 = <i>t</i> / <i>S</i> -dependent) | 1    | 1  | 0    | 0  | 0  | 0  | 1    | 1  | 1    | 1  | 1    | 1  | 0    |
| Adjustment method<br>(0 = DH, 1 = Davies)                                           | 1    | 1  | 1    | 1  | 1  | 1  | 1    | 1  | 0    | 0  | 0    | 0  | 0    |
| [met] (0 = default, 1 = experimental values)                                        | 0    | 1  | 0    | 0  | 1  | 1  | 0    | 1  | 0    | 1  | 0    | 1  | 0    |

319 Davies, Davies equation; DH, extended Debye-Hückel equation; [met], metabolite concentration values. Values  
 320 of 0 and 1 in the headers refer to the binary codification from the full factorial design (S4 Table). \*Run #3  
 321 represents the analytical conditions from the original matTFA, added here as a reference. The complete ranking  
 322 can be found in S4 Dataset. There is a ‘default matTFA’ constraint regarding set concentrations values for  
 323 cofactors (AMP, ADP and ATP) as included in the original matTFA code. ‘Experimental values’ refers to the use  
 324 of published metabolomics data (S2 Dataset). Correlation coefficient values were approximated to the third  
 325 floating number for ranking purposes.

326 The quality of predicted flux distributions was overall high: run #3 showed  
 327 approximately the same correlation coefficient as run #28 (0.89 and 0.92), whilst differing at  
 328 the metabolomics level (0.05 and 0.41). Hence, varying the physicochemical parameters  
 329 affected mainly the simulation of the metabolome (Fig. 3). The nature of <sup>13</sup>C-MFA only allows  
 330 determination of flux distributions in the central carbon metabolism by considering amino acid  
 331 synthesis (11), which has been noted to be very robust against changes in the intermediate  
 332 metabolite concentrations (32). In addition, the recent discovery of non-enzymatic  
 333 metabolism-like reactions suggests that current metabolic networks evolved from prebiotic  
 334 reaction sequences so that a well-established flux distribution in the central pathways can be  
 335 expected (60).

336 The best results were achieved by using *I* = 0.25 M, as done in the original matTFA  
 337 toolbox. Adjusting *t* at 37 °C along with using the Davies equation produced an improvement  
 338 from 4% to 17% at the metabolomics level, without affecting the fluxomics predictive  
 339 capabilities (4<sup>th</sup> and 3<sup>rd</sup> top values, respectively). Interestingly, the runs with the highest joint

340 score did not consider S, but did use the  $t/S$ -dependent function for the parameter  $A$ . Using  
341 experimental metabolomics data (38) did not improve the correlation coefficient at the  
342 fluxomics or metabolomics level in any run. However, it enabled performing a concordance  
343 analysis which showed that a predicted flux distribution with a high correlation coefficient  
344 against experimental fluxomics data did not guarantee a strong link between predicted and  
345 experimental metabolite concentrations. Consequently, this allowed identifying the set of  
346 physicochemical parameters with the highest predictive capability, an assessment that has not  
347 been performed in the literature. It has been shown exploiting metabolomics data becomes  
348 particularly useful for determining flux patterns when the uncertainty in predicted  $\Delta G_f^\circ$  is low  
349 (49). It should be noted that in matTFA, Gibbs free energy values are relaxed when no feasible  
350 solution is found (18) so that the constraining power of experimental metabolite concentration  
351 values is reduced.

352

### 353 **Simulation of metabolic fluxes under thermophilic growth conditions (*T. thermophilus*)**

354 A GSM for *T. thermophilus* HB27 (43) along with experimental measurements (fluxomics and  
355 bioprocessing data) for *T. thermophilus* HB8 (Table 2) were used to assess the fluxomics  
356 predictive capabilities of the mod-matTFA (S5 Dataset). Particularly, 5 parameters with  
357 2 levels each were tested (Table 3), yielding 32 runs (Fig. 4).

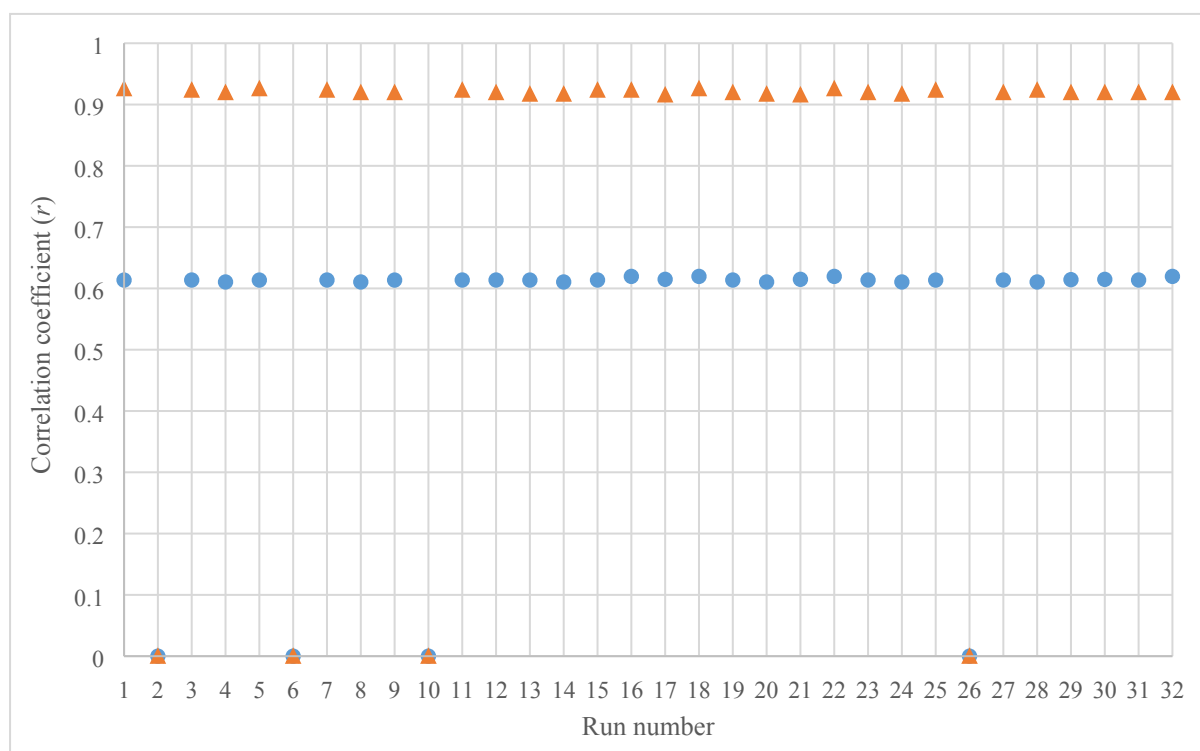

358



359 **Fig. 4. Goodness-of-fit analysis for predicted flux distributions under thermophilic growth conditions.**  
360 ● = FBA (after fixing directionalities) against  $^{13}\text{C}$ -MFA, ▲ = TFA against  $^{13}\text{C}$ -MFA. Run #1 recreates the  
361 analytical conditions as performed in the original matTFA toolbox.

362 The results for both FBA and TFA showed consistency between runs, with  $r \approx 0.6$  and  
363  $r \approx 0.9$  respectively, using a  $v_{\text{glucose uptake}}$  equivalent to 110% of an experimental value  
364 (S1 Appendix). Even though the specific growth rate was constrained in the interval  
365 0.11 to 0.60, predicted values (0.25 and 0.29  $\text{h}^{-1}$  for FBA and TFA) were similar to the  
366 published value of 0.22  $\text{h}^{-1}$  (Table 2). The average predicted  $Y_{XS}$  for FBA  
367 ( $\approx 0.38$  g DCW/g glucose) and TFA ( $\approx 0.44$  g DCW/g glucose) proved to be close to the  
368 experimental value ( $\approx 0.33$  g DCW/g glucose). As explained for *E. coli*,  
369 matTFA/mod-matTFA performs the FBA after fixing directionalities, which depends on  
370 thermodynamic parameters. Hence, runs #2, #6, #10 and #26 (both with  $T = 72$  °C and  
371  $I = 0.50$  M in common) resulted from some fixed directionalities so that no feasible solution  
372 could be found in FBA and TFA. Since the lack of metabolomics data prevented from further  
373 studying the predictive capabilities at both levels, the impact of adjusting the physicochemical  
374 parameters to an environment with high salt content and temperature could not be assessed.  
375 However, it should be noted that in general, predicted metabolic fluxes in the central carbon  
376 metabolism by TFA showed a good correlation coefficient with *in vivo* data, as in the previous  
377 case.

378

#### 379 **Comparison of metabolomics predictions of TFA with an MDF approach (*E. coli*)**

380 MDF-based methods are limited by the fact that they cannot generate flux distributions, so they  
381 depends on other approaches to provide that information. eQuilibrator (an user-friendly online  
382 MDF-based tool (24)) can predict metabolite concentrations values from a given flux  
383 distribution, instead of calculating both at the same time as matTFA does. The 64 flux  
384 distributions previously obtained were used as input data for an in-house MDF script (pH = 7.0  
385 with  $I = 0$  M or  $I = 0.25$  M) (Fig. 2), and the correlation coefficient between predicted  
386 metabolite concentration values and experimental metabolomics data was calculated. It should  
387 be noted that Gibbs free energy of formation values ( $\Delta G_f^\circ$ ) in the thermodynamic databases for  
388 matTFA and eQuilibrator were not exactly the same (Table 1), so that this test focused on  
389 comparing their predictive capabilities using eQuilibrator as it is available online.

390 Overall, MDF showed a better predictive capability than TFA, based on a lower  
391 variation between runs calculated with different physicochemical parameters (standard  
392 deviations lower than 0.05). For flux distributions obtained by FBA after fixing directionalities,

### Predictive capabilities of thermodynamics-based stoichiometric approaches

393  $r \approx 0.38$  were obtained for all runs when considering both  $I$  values. Similarly,  $r \approx 0.45$  was  
394 achieved for TFA (S6 Dataset), which indicates a lower sensitivity to variations than TFA  
395 (Fig. 3). Thus, we believe that eQuilibrator has proven to be ideal for small metabolic networks  
396 or parts of pathways, whereas TFA-based approaches should be used when analysing GSM. In  
397 this sense, differences in the problem definition (Table 1) should be further studied to identify  
398 potential strategies allowing to improve TFA-based approaches.

399 **Flux pattern changes between *in vivo* and *in silico* fluxes in the central carbon metabolism**

400 In order to evaluate changes in reaction directionalities, the available *in vivo* fluxes were tested  
401 against their equivalents in the simulated TFA flux distributions (S1-S2 Tables). Overall, the  
402 ‘anaplerotic node’ (Fig. 5) is particularly affected. For *E. coli*, changes in the flux pattern were  
403 found for 12/40 of the central carbon metabolism reactions from <sup>13</sup>C-MFA (Table 6), out of  
404 which three changed between the TFA runs (FBA, PYK and TALA). In the case of  
405 *T. thermophilus*, 14/38 mapped reactions showed a different sign from the predicted using  
406 matTFA (Table 7).

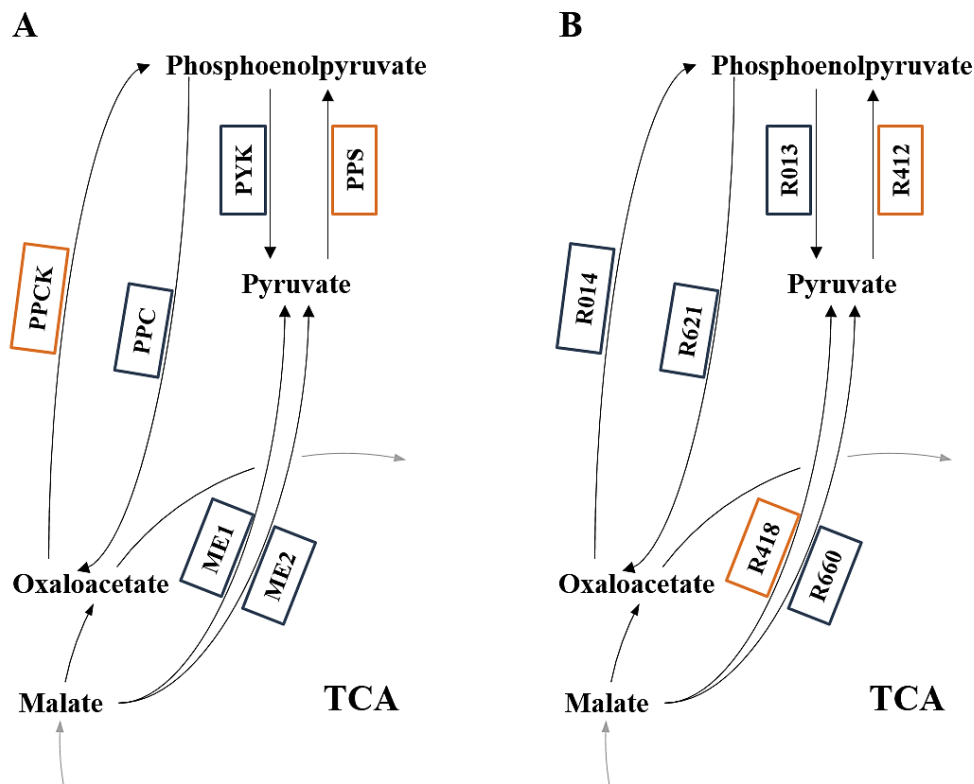

407

408 **Fig. 5. Anaplerotic node for *E. coli* (A) and *T. thermophilus* (B).** Set of carboxylation/decarboxylation reactions  
409 including phosphoenolpyruvate, pyruvate, oxaloacetate, and malate. Arrows indicate the expected direction of  
410 carbon fluxes. Boxes refer to reactions: blue when they are defined in both the GSM and the metabolic network  
411 used for <sup>13</sup>C-MFA, and orange when they are exclusively considered in the GSM. In the latter case no mapping  
412 was possible (S1-S2 Tables).

413 Discrepancies in flux pattern between methods are caused by both differences in the  
414 structure of the metabolic networks and the way the problem is defined (Table 1). On the one  
415 hand, *iJO1366* includes 8 reactions concerning the anaplerotic node and the glyoxylate shunt  
416 (S4 Dataset): PPC and PPCK (between phosphoenolpyruvate and oxaloacetate), PYK and PPS  
417 (between phosphoenolpyruvate and pyruvate), ME1 and ME2 (between pyruvate and malate)  
418 (Fig. 5), and finally ICL and MALS (from isocitrate to malate, via glyoxylate). In contrast, the  
419 metabolic network used for the <sup>13</sup>C-MFA did not consider PPCK and PPS (S1 Table), which  
420 could have affected the determination of fluxes to/from phosphoenolpyruvate. Since <sup>13</sup>C-MFA

421 is based on lumped reaction, branched pathways are not taken into account (11). Thus, having  
 422 a smaller range of alternative pathways than FBA/TFA may affect the estimation of flux values.

423 **Table 6. Flux pattern changes between  $^{13}\text{C}$ -MFA data and matTFA predictions in *E. coli*.**

| Reaction (GSM) | Definition (GSM)                                                 | Definition ( $^{13}\text{C}$ -MFA)    | Direction ( $^{13}\text{C}$ -MFA) | Corrected direction ( $^{13}\text{C}$ -MFA) | Direction (TFA) |
|----------------|------------------------------------------------------------------|---------------------------------------|-----------------------------------|---------------------------------------------|-----------------|
| ACALD          | acald_c + coa_c + nad_c $\leftrightarrow$ accoa_c + h_c + nadh_c | AcCoA $\rightarrow$ Ethanol           | +                                 | -                                           | 0               |
| ACKr           | ac_c + atp_c + h_c $\leftrightarrow$ actp_c + adp_c              | AcCoA $\rightarrow$ Acetate           | 0                                 | 0                                           | +               |
| ALCD2x         | etoh_c + nad_c $\leftrightarrow$ acald_c + h_c + nadh_c          | AcCoA $\rightarrow$ Ethanol           | +                                 | -                                           | +               |
| FBA            | fdp_c $\leftrightarrow$ dhap_c + g3p_c                           | F1,6P $\rightarrow$ DHAP + G3P        | +                                 | +                                           | 0/+             |
| ICL            | icit_c $\rightarrow$ glx_c + succ_c                              | ICT $\rightarrow$ Glyoxylate + SUC    | +                                 | +                                           | 0               |
| ME1            | mal-L_c + nad_c $\rightarrow$ co2_c + nadh_c + pyr_c             | MAL $\rightarrow$ PYR + CO2           | +                                 | +                                           | 0               |
| ME2            | mal-L_c + nadp_c $\rightarrow$ co2_c + nadph_c + pyr_c           | MAL $\rightarrow$ PYR + CO2           | +                                 | +                                           | 0               |
| PFK            | atp_c + f6p_c $\leftrightarrow$ adp_c + fdp_c                    | F6P $\rightarrow$ F1,6P               | +                                 | +                                           | 0/+             |
| PTAr           | accoa_c + h_c + pi_c $\leftrightarrow$ actp_c + coa_c            | AcCoA $\rightarrow$ Acetate           | 0                                 | 0                                           | -               |
| PYK            | adp_c + pep_c $\leftrightarrow$ atp_c + pyr_c                    | PEP $\rightarrow$ PYR                 | +                                 | +                                           | 0/+             |
| SUCOAS         | atp_c + coa_c + succ_c $\leftrightarrow$ adp_c + pi_c + succoa_c | 2-KG $\rightarrow$ SUC + CO2          | +                                 | +                                           | -               |
| TALA           | g3p_c + s7p_c $\leftrightarrow$ e4p_c + f6p_c                    | S7P + G3P $\leftrightarrow$ E4P + F6P | +                                 | +                                           | -/0/+           |

424 Where +, flux in the forward direction; -, flux in the reverse direction; 0, no flux. *Corrected direction*, refers to  
 425 the adjustments due to differences in the definition of the reaction between  $^{13}\text{C}$ -MFA and GSM (S1 Table). For  
 426 example the case of ALCD2x: *in vivo* flux ( $^{13}\text{C}$ -MFA) suggests production of ethanol, whereas the *in silico* one  
 427 (GSM/TFA) predicts consumption of ethanol. Since reactions are defined in opposite directions, a correction  
 428 becomes necessary. Discrepancy between corrected directions and predicted ones allowed an automated  
 429 identification of flux pattern changes.

430 On the other hand, *in silico* flux distributions are the result of optimising the system  
 431 according to the chosen objective function. Thus, FBA and TFA promote pathways with a  
 432 lower energetic cost (when possible), as illustrated by the fact that PPC (ATP-consuming  
 433 reaction) carries no flux (S4 Dataset). In contrast, experimental data from *E. coli* grown on  
 434 glucose has proven that both PPC and PPCK (which constitute a *futile cycle*) are active and

435 play a role in metabolic regulations (61). However, given the fact that ICL and ME1/ME2 do  
 436 not generate any ATP, fluxes are shut down in the simulated flux distributions (as shown in  
 437 (32)). In this sense, it should be noted that stochastic events or regulatory processes have been  
 438 suggested to provoke a variation of the fluxes through PPCK and ME1/ME2 (62). FBA/TFA  
 439 also faced problems regarding the overflow metabolism, represented by acetate production  
 440 (PTAr and ACKr): acetate was consumed rather than produced (32).

441 Results were similar for *T. thermophilus*. The GSM (*i*TT548) comprises 9 anaplerotic  
 442 reactions and the glyoxylate shunt (S5 Dataset): R014 and R621 (between  
 443 phosphoenolpyruvate and oxaloacetate), R013 and R412/413 (between phosphoenolpyruvate  
 444 and pyruvate), R660 (between pyruvate and malate), and finally R425 and R420 (between  
 445 isocitrate to malate, via glyoxylate). In this case the PEP-carboxykinase activity (R014) was  
 446 included in the metabolic network for <sup>13</sup>C-MFA (S2 Table). As for *E. coli*, this reaction carried  
 447 no flux in the TFA (Table 7), and the pool of malate was also affected. Regarding the glyoxylate  
 448 shunt, it should be noted that R425 (conversion of isocitrate into glyoxylate) carried no flux  
 449 for both <sup>13</sup>C-MFA and TFA. However, the consumption of glyoxylate was activated in TFA  
 450 (R420), which suggests that alternative pathways must have participated in the production of  
 451 glyoxylate.

452 **Table 7. Flux pattern changes between <sup>13</sup>C-MFA data and matTFA predictions in *T. thermophilus*.**

| Reaction (GSM) | Definition (GSM)                                  | Definition ( <sup>13</sup> C-MFA) | Direction ( <sup>13</sup> C-MFA) | Corrected direction ( <sup>13</sup> C-MFA) | Direction (TFA) |
|----------------|---------------------------------------------------|-----------------------------------|----------------------------------|--------------------------------------------|-----------------|
| R014           | atp_c + oaa_c → adp_c + pep_c + co2_c             | OAC + ATP → PEP + CO2             | +                                | +                                          | 0               |
| R016           | atp_c + coa_c + ac_c → ppi_c + amp_c + accoa_c    | AcCoA ↔ Ac + ATP (net)            | -                                | +                                          | 0/+             |
| R024           | nad_c + coa_c + akc_c → nadh_c + co2_c + succoa_c | AKG → SucCoA + CO2 + NADH         | +                                | +                                          | 0               |
| R026           | succ_c + fad_c ↔ fadh2_c + fum_c                  | Suc ↔ Fum + FADH2 (net)           | +                                | +                                          | -               |
| R027           | mal-L_c ↔ h2o_c + fum_c                           | Fum ↔ Mal (net)                   | +                                | -                                          | -/0             |
| R029           | glc-D_c + q_c → g15lac_c + qh2_c                  | *G6P → 6PG + NADPH                | +                                | +                                          | 0               |
| R041           | 2ddg6p_c → g3p_c + pyr_c                          | KDPG → Pyr + GAP                  | +                                | +                                          | 0               |
| R420           | h2o_c + accoa_c + glx_c → h_c + coa_c + mal-L_c   | Glyox + AcCoA → Mal               | 0                                | 0                                          | +               |
| R621           | pep_c + hco3_c ↔ pi_c + oaa_c                     | PEP + CO2 → OAC                   | +                                | +                                          | -               |

Predictive capabilities of thermodynamics-based stoichiometric approaches

|      |                                                  |                            |   |   |     |
|------|--------------------------------------------------|----------------------------|---|---|-----|
| R660 | nadp_c + mal-L_c →<br>pyr_c + co2_c +<br>nadph_c | Mal → Pyr + CO2 +<br>NADPH | + | + | 0   |
| R710 | atp_c + glcn_c → adp_c<br>+ h_c + 6pgc_c         | G6P → 6PG + NADPH          | + | + | 0   |
| R713 | h2o_c + gl5lac_c →<br>h_c + glcn_c               | G6P → 6PG + NADPH          | + | + | 0   |
| R714 | 6pgc_c → h2o_c +<br>2ddg6p_c                     | 6PG → KDPG                 | + | + | 0   |
| R722 | ac_e ↔ ac_c                                      | Ac → Ac.ext                | + | - | -/+ |

453 Where +, flux in the forward direction; -, flux in the reverse direction; 0, no flux. *Corrected direction*, refers to  
 454 the adjustments due to differences in the definition of the reaction between <sup>13</sup>C-MFA and GSM (S2 Table). The  
 455 directionality for R722 is the same: both the definition and the sign are opposed. \*Glucose-6-P (G6P) is used  
 456 instead of glucose (glc-D) due to an incongruence between the metabolic networks (S2 Table).

457

458 Even though flux pattern changes between predicted and experimentally determined  
 459 intracellular fluxes were present, TFA offered a reliable prediction of intracellular fluxes  
 460 (Figs. 3 and 4). This overall consistency has been noted in the literature by comparing an array  
 461 of different objective functions and constraints (based on split ratios rather than on mapping on  
 462 a reaction-by-reaction case) (13). A combination of both approaches to overcome their  
 463 limitations and discerning flux space solutions has also been suggested (63, 64). However,  
 464 fluxes concerning the TCA cycle, the glyoxylate shunt and acetate secretion have proven to be  
 465 difficult to predict (13), as also shown in this study. Similarly, other reactions are also affected  
 466 by the substrate uptake rate: ALCD2x becomes unidirectional at high glucose levels (26).

467 In addition, the nonlinear dependency of the anaplerotic fluxes on the growth rate has  
 468 been reported in the literature, limiting the reliability of conclusions from experiments using  
 469 single dilution rates (61, 62). Given the fact that substrate uptake rates had to be relaxed  
 470 (S1 Appendix), predicted growth rates (as well as other fluxes) differed from the corresponding  
 471 experimental ones (Table 2). Particularly, metabolic fluxes through the aforementioned futile  
 472 cycle are expected under glucose-limited growth conditions (65), rather than being totally shut  
 473 down (Fig. 5). In this sense, a higher degree of consistency between predicted and experimental  
 474 flux distributions could have been achieved by (i) focusing on data from cultures with high  
 475 dilution rates, so that futile cycle activity is lowered and the flux distribution becomes closer  
 476 to the optimal solution, or (ii) applying further constraints to properly model the anaplerotic  
 477 reactions (66). The first option is limited by the lack of published data at both the metabolomics  
 478 and fluxomics levels for the same experiment, and the second one by the unavailability of the  
 479 code (consequently it has not been widely used). In this sense, it was assumed that the high  
 480 correlation coefficient achieved for TFA against *in vivo* fluxomics data ( $r \approx 0.9$ ) was high

**Predictive capabilities of thermodynamics-based stoichiometric approaches**

481 enough to enable the analyses on the impact of varying the physicochemical parameters in the  
482 predictive capabilities.

## 483 Discussion

484 In the last two decades, biotechnology and systems biology have benefitted from the  
485 development of  $^{13}\text{C}$ -MFA and FBA to measure and estimate intracellular metabolic fluxes in  
486 industrially relevant bacteria. Although the influence of thermodynamics in living systems has  
487 been considered since several decades ago, its application to study biochemical networks has  
488 been only recently enabled (22, 29). In this sense, a multitude of different approaches  
489 constraining well-established modelling approaches with thermodynamics have been  
490 suggested. Given their relevance and the code availability, this study focused on analysing TFA  
491 and MDF (performed by matTFA toolbox and eQuilibrator, respectively). Two main points  
492 were explored: (i) their reliability in predicting metabolic fluxes and metabolite concentration  
493 values, and (ii) the possibility of improvement by widening the range (and values) of certain  
494 physicochemical parameters. Towards this end, GSMs and *in vivo* fluxomics data from the  
495 mesophile *E. coli* and the thermophile *T. thermophilus* were selected.

496 Due to the interest in comparing results with the original matTFA, maximisation of  
497 biomass yield ( $Y_{XS}$ ) was selected as the objective function and energetic requirements  
498 maintained (S1 Appendix). Given the nature of  $^{13}\text{C}$ -MFA, the validation of predicted fluxomes  
499 between different sets of physicochemical parameters could only consider fluxes in the central  
500 carbon metabolism. Overall, TFA provided more accurate flux distributions than FBA for both  
501 bacteria, even though substrate uptake rates for TFA had to be set higher than the experimental  
502 ones to obtain a solution (as set in the original matTFA toolbox). Surprisingly, different sets of  
503 physicochemical parameters did not produce changes in the reliability of the predicted flux  
504 distributions. We hypothesise that this was due to the proven robustness of metabolic fluxes in  
505 these pathways against changes in the metabolic state, as previously noted (32, 33).

506 Regarding the metabolomics level, our modified matTFA showed that widening the  
507 range of parameters and adjusting them to the experimental growth conditions improves the  
508 predictive capabilities of TFA. Hence, we suggest the adjustment of the physicochemical  
509 parameters when simulating mesophiles and thermophiles (away from biochemical standard  
510 conditions) should be considered. The best *in silico* metabolite concentrations profile had a  
511 correlation coefficient with experimental data of 41%, against the 5% from the conditions  
512 recreating the original matTFA (having in both cases  $\approx 90\%$  at the fluxomics level). We believe  
513 that a combination of several limitations and factors account for this upper achievable  
514 correlation coefficient with experimental concentration values. They can be listed at different



515 levels: (i) thermodynamic and physicochemical parameters, (ii) problem formulation and  
516 constrains, and (iii) suitability of available experimental data.

517         Apart from intrinsic uncertainties in the experimental or theoretical determination of  
518 Gibbs free energy values, it should be noted that it was not possible to account for deviations  
519 from standard conditions in temperature by using the Gibbs-Helmholtz equation. In addition,  
520 matTFA/mod-matTFA do not consider other relevant factors affecting the thermodynamic  
521 feasibility of metabolic pathways such as Mg complexation with metabolites, or compound  
522 dissociation into more than two protonated species (17, 18) (as shown in the file  
523 *calcDGspecies.m*).

524         Regarding the problem formulation, although maximisation of  $Y_{XS}$  is the default  
525 objective function, recent studies have suggested that maximisation of the ATP yield and  
526 minimisation of the sum of fluxes are competing with the former (14). In this sense,  
527 TR-fluxmin also defines the problem as a MILP, but focuses on minimising the overall sum of  
528 fluxes (whilst optimising a chosen reaction) and considers soft/hard bounds for metabolite  
529 concentrations values to allow for relaxation (19). To the best of our knowledge, matTFA does  
530 not offer those options (18). Since the objective function determines the flux space solution  
531 (12), by extension it also affects the associated metabolite concentrations profile. Hence,  
532 experimental values might be outside the allowable metabolite space solution. Studying flux  
533 pattern changes on a reaction-by-reaction basis also allowed to confirm previously reported  
534 limitations from both  $^{13}\text{C}$ -MFA and FBA/TFA with regards to the anaplerotic node (36, 37,  
535 66). Consequently, metabolites in the node are expected to be directly affected. Potential  
536 solutions adding extra constraints have been suggested in the literature (66), but they have not  
537 been widely implemented.

538         Our results showed that using predefined ATP/ADP/AMP concentration values (as in  
539 the original matTFA) or constraining with experimental metabolomics data lead to the same  
540 predictive capabilities (Table 5), when maximising  $Y_{XS}$ . In this sense, the possibility of  
541 achieving different metabolic space solutions when assuming another objective function cannot  
542 be ruled out, which stresses the necessity for accurate quantitative metabolomics data (6). For  
543 the matter of our analysis, it should be noted that pre-existing metabolite concentration values  
544 focusing on the central carbon metabolism were used. Alternatively, there are theoretical  
545 approaches based on sensitivity analysis to identify metabolites of interest to be considered  
546 during the experimental design (67). As a matter of fact, relative metabolite abundance data  
547 has been successfully combined with thermodynamics to improve flux prediction between  
548 differential physiological states (54). The impact of the inherent dynamics (cell cycle and cell

549 ageing) has been pointed out as a source of metabolic heterogeneity in clonal microbial  
550 populations (68). In a chemostat, cells are maintained at the exponential growth phase, but the  
551 cell cycle is not synchronised across single cells unless forced (69, 70). In *E. coli*, concentration  
552 values for NAD(P)H oscillate along the cell cycle (71), and ATP concentration values show an  
553 asymmetric distribution across single cells in a continuous culture (72). Hence, it can be  
554 assumed that a distribution of cells at different stages is achieved in steady state, so that  
555 experimental fluxomics and metabolomics data reflect a weighted average of the different flux  
556 distributions and metabolite concentration profiles from each stage. In this sense, it should not  
557 surprise that the predicted concentration values from one flux distribution (obtained by  
558 optimising just one objective function) differ from the average experimental profile. However,  
559 given the robustness of fluxes in the central carbon metabolism (33, 60), we do not expect this  
560 phenomenon to explain by itself deviations in metabolite concentration values in the central  
561 carbon metabolism. Instead, we believe that the predictive capabilities of this approach depend  
562 on all the previously stated limitations, as well as the fact that phenomena such as substrate  
563 tunnelling (according to which intermediates are not released into solution) (73) or cell size  
564 variations over the cell cycle (which directly affects the concentration values) (74) were not  
565 considered.

566       Regarding MDF, using the predicted fluxomes (FBA and TFA) as input data for an  
567 eQuilibrator-like approach (MDF-based) did not result in remarkably improved simulated  
568 metabolite concentration values. Thus, we believe a TFA-based approach should be used for  
569 analysing GSMs, and eQuilibrator to be used as a user-friendly biochemical calculator for  
570 smaller metabolic networks. Nevertheless, similarities and differences regarding the problem  
571 definition could be an interesting source to further develop the TFA framework.

572       This study proved that the predictive capabilities of thermodynamics-based  
573 stoichiometric approaches can be improved by adjusting the considered physicochemical  
574 parameters to the experimental conditions. Additionally, our study stressed out the necessity  
575 of performing an in-depth assessment of available methods in the fluxomics field. In particular,  
576 we believe interesting published potential solutions to known problems (e.g. elucidation of the  
577 anaplerotic fluxes) should be integrated with the widely used approaches. This should increase  
578 the degree of standardisation in the community, allowing to cross-validate novel strategies and  
579 improving the reliability of the simulated data.

580

581 **Acknowledgements**

582 We would like to thank Nicole Pearcy for her helpful comments.

583

584

585

586

## 587 **References**

- 588 1. Stephanopoulos G, Alper H, Moxley J. Exploiting biological complexity for strain  
589 improvement through systems biology. *Nat Biotechnol.* 2004;22(10):1261-7.
- 590 2. Kell DB, Oliver SG. Here is the evidence, now what is the hypothesis? The  
591 complementary roles of inductive and hypothesis-driven science in the post-genomic era.  
592 *BioEssays.* 2003;26:99-105.
- 593 3. Dai Z, Nielsen J. Advancing metabolic engineering through systems biology of  
594 industrial microorganisms. *Curr Opin Biotechnol.* 2015;36:8-15.
- 595 4. Park JH, Lee SY, Kim TY, Kim HU. Application of systems biology for bioprocess  
596 development. *Trends Biotechnol.* 2008;26(8):404-12.
- 597 5. Toya Y, Shimizu H. Flux analysis and metabolomics for systematic metabolic  
598 engineering of microorganisms. *Biotechnol Adv.* 2013;31(6):818-26.
- 599 6. Kim DH, Achcar F, Breitling R, Burgess KE, Barrett MP. LC-MS-based absolute  
600 metabolite quantification: application to metabolic flux measurement in trypanosomes.  
601 *Metabolomics.* 2015;11(6):1721-32.
- 602 7. Cortassa S, Caceres V, Bell LN, O'Rourke B, Paolocci N, Aon MA. From metabolomics  
603 to fluxomics: a computational procedure to translate metabolite profiles into metabolic  
604 fluxes. *Biophysical Journal.* 2015;108(1):163-72.
- 605 8. van Eunen K, Kiewiet JAL, Westerhoff HV, Bakker BM. Testing Biochemistry  
606 Revisited: How In Vivo Metabolism Can Be Understood from In Vitro Enzyme Kinetics.  
607 *PLoS Comput Biol.* 2012;8(4).
- 608 9. Tomar N, De RK. Comparing methods for metabolic network analysis and an  
609 application to metabolic engineering. *Gene.* 2013;521(1):1-14.
- 610 10. Feist AM, Herrgard MJ, Thiele I, Reed JL, Palsson BO. Reconstruction of biochemical  
611 networks in microorganisms. *Nat Rev Microbiol.* 2009;7(2):129-43.
- 612 11. Antoniewicz MR. Methods and advances in metabolic flux analysis: a mini-review.  
613 *J Ind Microbiol Biotechnol.* 2015;42(3):317-25.
- 614 12. Orth JD, Thiele I, Palsson BO. What is flux balance analysis? *Nat Biotechnol.*  
615 2010;28(3):245-8.
- 616 13. Schuetz R, Kuepfer L, Sauer U. Systematic evaluation of objective functions for  
617 predicting intracellular fluxes in *Escherichia coli*. *Molecular Systems Biology.* 2007;3(119).
- 618 14. Schuetz R, Zamboni N, Zampieri M, Heinemann M, Sauer M. Multidimensional  
619 optimality of microbial metabolism. *Science.* 2012;336:601-4.
- 620 15. Long CP, Antoniewicz MR. High-resolution <sup>13</sup>C metabolic flux analysis. *Nat Protoc.*  
621 2019.
- 622 16. Wiechert W, Noh K. Isotopically non-stationary metabolic flux analysis: complex  
623 yet highly informative. *Curr Opin Biotechnol.* 2013;24(6):979-86.
- 624 17. Vojinović V, Von Stockar U. Influence of uncertainties in pH, pMg, activity  
625 coefficients, metabolite concentrations, and other factors on the analysis of the  
626 thermodynamic feasibility of metabolic pathways. *Biotechnol Bioeng.* 2009;103(4):780-  
627 95.
- 628 18. Salvy P, Fengos G, Ataman M, Pathier T, Soh KC, Hatzimanikatis V. pyTFA and  
629 matTFA a Python package and a Matlab toolbox for Thermodynamics-based Flux Analysis.  
630 *Bioinformatics.* 2018;1(3).
- 631 19. Hoppe A, Hoffmann S, Holzhütter H-G. Including metabolite concentrations into  
632 flux balance analysis: thermodynamic realizability as a constraint on flux distributions in  
633 metabolic networks. *BMC Syst Biol.* 2007;1(23).
- 634 20. Park JO, Rubin SA, Xu YF, Amador-Noguez D, Fan J, Shlomi T, et al. Metabolite  
635 concentrations, fluxes and free energies imply efficient enzyme usage. *Nat Chem Biol.*  
636 2016;12.
- 637 21. Ataman M, Hatzimanikatis V. Heading in the right direction: thermodynamics-based  
638 network analysis and pathway engineering. *Curr Opin Biotechnol.* 2015;36:176-82.
- 639 22. Beard DA, Babson E, Curtis E, Qian H. Thermodynamic constraints for biochemical  
640 networks. *J Theor Biol.* 2004;228:327-33.
- 641 23. Kümmel A, Panke S, Heinemann M. Putative regulatory sites unraveled by network-  
642 embedded thermodynamic analysis of metabolome data. *Mol Syst Biol.* 2006.

- 643 24. Flamholz A, Noor E, Bar-Even A, Milo R. eQuilibrator - the biochemical  
644 thermodynamics calculator. *Nucleic Acids Res.* 2012;40:D770–D5.
- 645 25. Henry CS, Broadbelt LJ, Hatzimanikatis V. Thermodynamics-Based Metabolic Flux  
646 Analysis. *Biophys J.* 2007;92:1792–805.
- 647 26. Niebel B, Leupold S, Heinemann M. An upper limit on Gibbs energy dissipation  
648 governs cellular metabolism. *Nat Metab.* 2019;1:125–32.
- 649 27. Simonin J-P. Thermodynamic consistency in the modeling of speciation in  
650 selfcomplexing electrolytes. *Ind Eng Chem Res.* 2017;56:9721–33.
- 651 28. Fleming RM, Thiele I. von Bertalanffy 1.0: a COBRA toolbox extension to  
652 thermodynamically constrain metabolic models. *Bioinformatics.* 2011;27(1):142–3.
- 653 29. Alberty RA. *Thermodynamics of Biochemical Reactions*: John Wiley & Sons; 2005.
- 654 30. Noor E, Haraldsdóttir HS, Milo R, Fleming RM. Consistent estimation of Gibbs  
655 energy using component contributions. *PLoS Comput Biol.* 2013;9(7).
- 656 31. Jankowski K, Henry CS, Broadbelt LJ, Hatzimanikatis V. Group contribution method  
657 for thermodynamic analysis of complex metabolic networks. *Biophys J.* 2008;95:1487–99.
- 658 32. Toya Y, Ishii N, Nakahigashi K, Hirasawa T, Soga T, Tomita M, et al. <sup>13</sup>C-metabolic  
659 flux analysis for batch culture of *Escherichia coli* and its *pyk* and *pgi* gene knockout mutants  
660 based on mass isotopomer distribution of intracellular metabolites. *Biotechnol Prog.*  
661 2010;26(4):975–92.
- 662 33. Costenoble R, Muller D, Barl T, van Gulik WM, van Winden WA, Reuss M, et al. <sup>13</sup>C-  
663 Labeled metabolic flux analysis of a fed-batch culture of elutriated *Saccharomyces*  
664 *cerevisiae*. *FEMS Yeast Res.* 2007;7(4):511–26.
- 665 34. Owen OE, Kalhan SC, Hanson RW. The key role of anaplerosis and cataplerosis for  
666 citric acid cycle function. *J Biol Chem.* 2002;277(34):30409–12.
- 667 35. Sauer U, Eikmanns BJ. The PEP-pyruvate-oxaloacetate node as the switch point for  
668 carbon flux distribution in bacteria. *FEMS Microbiol Rev.* 2005;29(765–794).
- 669 36. Kappelmann J, Wiechert W, Noack S. Cutting the Gordian Knot: Identifiability of  
670 anaplerotic reactions in *Corynebacterium glutamicum* by means of (<sup>13</sup>) C-metabolic flux  
671 analysis. *Biotechnol Bioeng.* 2015;113(3).
- 672 37. Fischer E, Zamboni N, Sauer U. High-throughput metabolic flux analysis based on  
673 gas chromatography–mass spectrometry derived <sup>13</sup>C constraints. *Anal Biochem.*  
674 2004;325(2):308–16.
- 675 38. Ishii N, Nakahigashi K, Baba T, Robert M, Soga T, Kanai A, et al. Multiple high-  
676 throughput analyses monitor the response of *E.coli* to perturbations. *Science.*  
677 2007;316(5824):593–7.
- 678 39. Cordova LT, Cipolla RM, Swarup A, Long CP, Antoniewicz MR. <sup>13</sup>C metabolic flux  
679 analysis of three divergent extremely thermophilic bacteria: *Geobacillus* sp. LC300,  
680 *Thermus thermophilus* HB8, and *Rhodothermus marinus* DSM 4252. *Metab Eng.*  
681 2017;44:182–90.
- 682 40. Crosby JR, Laemthong T, Lewis AM, Straub CT, Adams MW, Kelly RM. Extreme  
683 thermophiles as emerging metabolic engineering platforms. *Curr Opin Biotechnol.*  
684 2019;59:55–64.
- 685 41. King ZA, Lu J, Dräger A, Miller P, Federowicz S, Lerman JA, et al. BiGG Models: A  
686 platform for integrating, standardizing, and sharing genome-scale models. *Nucleic Acids*  
687 *Res.* 2016;44:D515–D22.
- 688 42. Orth JD, Conrad TM, Na J, Lerman JA, Nam H, Feist AM, et al. A comprehensive  
689 genome-scale reconstruction of *Escherichia coli* metabolism—2011. *Mol Syst Biol.*  
690 2011(535).
- 691 43. Lee N-R, Lakshmanan M, Aggarwal S, Song J-W, Karimi IA, Lee D-Y, et al. Genome-  
692 scale metabolic network reconstruction and in silico flux analysis of the thermophilic  
693 bacterium *Thermus thermophilus* HB27. *Microb Cell Fact.* 2014;13(61).
- 694 44. Folsom JP, Carlson RP. Physiological, biomass elemental composition and proteomic  
695 analyses of *Escherichia coli* ammonium-limited chemostat growth, and comparison with  
696 iron- and glucose-limited chemostat growth. *Microbiology.* 2015;161:1659–70.
- 697 45. J. CSH, Cai J, Wang L, Simons-Senftle MN, Maranas CD. Standardizing biomass  
698 reactions and ensuring complete mass balance in genome-scale metabolic models.  
699 *Bioinformatics.* 2017;33(22):3603–9.

- 700 46. Schellenberger J, Que R, Fleming RM, Thiele I, Orth JD, Feist AM, et al. Quantitative  
701 prediction of cellular metabolism with constraint-based models: the COBRA Toolbox v2.0.  
702 Nat Protoc. 2011;6(9):1290-307.
- 703 47. Sandve GK, Nekrutenko A, Taylor J, Hovig E. Ten Simple Rules for Reproducible  
704 Computational Research. PLoS Comput Biol. 2013;9(10).
- 705 48. Atkins P, Paula Jd. Equilibrium electrochemistry. Atkins' physical chemistry. United  
706 States: Oxford University Press; 2002.
- 707 49. Fleming RM, Thiele I, Nasheuer HP. Quantitative assignment of reaction  
708 directionality in constraint-based models of metabolism: Application to Escherichia coli.  
709 Biophys Chem. 2009;145:47-56.
- 710 50. Siedler G, Peters H. Physical properties (general) of sea water. Oceanography.  
711 Landolt-Börnstein: Numerical data and functional relationships in science and technology.  
712 V/3a. Berlin: Springer; 1986. p. 233-64.
- 713 51. Meissner T, Wentz FJ. The complex dielectric constant of pure and sea water from  
714 microwave satellite observations. IEEE T Geosci Remote. 2004;42(9):1836-49.
- 715 52. Millero FJ, Leung WH. Thermodynamics of seawater at one atmosphere. Am J Sci.  
716 1976;276:1035-77.
- 717 53. Baldwin WW, Myer R, Powell N, Anderson E, Koch AL. Buoyant density of  
718 Escherichia coli is determined solely by the osmolarity of the culture medium. Arch  
719 Microbiol. 1995;164:155-7.
- 720 54. Pandey V, Hadadi N, Hatzimanikatis V. Enhanced flux prediction by integrating  
721 relative expression and relative metabolite abundance into thermodynamically consistent  
722 metabolic models. PLoS Comput Biol. 2019;15(5).
- 723 55. Field A. Discovering statistic using SPSS. 3rd ed: SAGE Publications; 2009.
- 724 56. Kanehisa M, Goto S. KEGG: Kyoto Encyclopedia of Genes and Genomes. Nucleic  
725 Acids Res. 2000;28(1):27-30.
- 726 57. Wohlgemuth G, Haldiya PK, Willighagen E, Kind T, Fiehn O. The Chemical  
727 Translation Service—a web-based tool to improve standardization of metabolomic reports.  
728 Bioinformatics. 2010;26(20):2647-8.
- 729 58. Neidhardt FC, Curtiss R. Escherichia coli and Salmonella: cellular and molecular  
730 biology. Second ed. Washington, D.C.: ASM Press; 1996.
- 731 59. von Stockar U, Maskow T, Liu J, Marison IW, Patiño R. Thermodynamics of microbial  
732 growth and metabolism: An analysis of the current situation. J Biotechnol. 2006;121:517-  
733 33.
- 734 60. Ralser M. An appeal to magic? The discovery of a non-enzymatic metabolism and  
735 its role in the origins of life. Biochem J. 2018;475:2577-92.
- 736 61. Yang C, Hua Q, Baba T, Mori H, Shimizu K. Analysis of Escherichia coli anaplerotic  
737 metabolism and its regulation mechanisms from the metabolic responses to altered  
738 dilution rates and phosphoenolpyruvate carboxykinase knockout. Biotechnol Bioeng.  
739 2003;84(2):129-44.
- 740 62. Nanchen A, Schicker A, Sauer U. Nonlinear dependency of intracellular fluxes on  
741 growth rate in miniaturized continuous cultures of Escherichia coli. Appl Environ Microb.  
742 2006;72(2):1164-72.
- 743 63. Williams TCR, Poolman MG, Howden AJM, Schwarzlander M, Fell DA, Ratcliffe RG,  
744 et al. A genome-scale metabolic model accurately predicts fluxes in central carbon  
745 metabolism under stress conditions. Plant Physiol. 2010;154:311-23.
- 746 64. Chen X, Alonso AP, Allen DK, Reed JL, Shachar-Hill Y. Synergy between (13)C-  
747 metabolic flux analysis and flux balance analysis for understanding metabolic adaptation  
748 to anaerobiosis in E. coli. Metab Eng. 2011;13(1):38-48.
- 749 65. Sauer U, Lasko DR, Fiaux J, Hochuli M, Glaser R, Szyperski T, et al. Metabolic flux  
750 ratio analysis of genetic and environmental modulations of Escherichia coli central carbon  
751 metabolism. J Bacteriol. 1999;181(21):6679-88.
- 752 66. Myoung Park J, Yong Kim T, Yup Lee S. Prediction of metabolic fluxes by  
753 incorporating genomic context and flux-converging pattern analyses. P Natl Acad Sci USA.  
754 2010;107(33):14931-6.
- 755 67. Kiparissides A, Hatzimanikatis V. Thermodynamics-based Metabolite Sensitivity  
756 Analysis in metabolic networks. Metab Eng. 2017;39:117-27.

Predictive capabilities of thermodynamics-based stoichiometric approaches

- 757 68. Takhaveev V, Heinemann M. Metabolic heterogeneity in clonal microbial  
758 populations. *Curr Opin Microbiol.* 2018;45:30-8.
- 759 69. Goodwin BC. Synchronization of *Escherichia coli* in a chemostat by periodic  
760 phosphate feeding. *Eur J Biochem.* 1969;10:511-4.
- 761 70. Massie TM, Blasius B, Weithoff G, Gaedke U, Fussmann GF. Cycles, phase  
762 synchronization, and entrainment in single-species phytoplankton populations. *P Natl Acad*  
763 *Sci USA.* 2010;107(9):4236-41.
- 764 71. Zhang Z, Miliadis-Argeitis A, Heinemann M. Dynamic single-cell NAD(P)H  
765 measurement reveals oscillatory metabolism throughout the *E. coli* cell division cycle. *Sci*  
766 *Rep-UK.* 2018;8(2162).
- 767 72. Yaginuma H, Kawai S, Tabata KV, Tomiyama K, Kakizuka A, Komatsuzaki T, et al.  
768 Diversity in ATP concentrations in a single bacterial cell population revealed by quantitative  
769 single-cell imaging. *Sci Rep-UK.* 2014;4(6522).
- 770 73. Huang X, Holden HM, Raushel FM. Channeling of substrates and intermediates in  
771 enzyme-catalyzed reactions. *Annu Rev Biochem.* 2001;70:149-80.
- 772 74. Barber F, Ho P-Y, Murray AW, Amir A. Details matter: noise and model structure  
773 set the relationship between cell size and cell cycle timing. *Front Cell Dev Biol.* 2017;5(92).
- 774
- 775

776 **Author contributions**

777

778 **Conceptualisation:** Claudio Tomi-Andrino, Thomas Millat

779 **Data curation:** Claudio Tomi-Andrino

780 **Formal analysis:** Claudio Tomi-Andrino, Rupert Norman

781 **Methodology:** Claudio Tomi-Andrino, Rupert Norman, Thomas Millat, Philippe Soucaille

782 **Project administration:** Claudio Tomi-Andrino

783 **Resources:** Klaus Winzer, David A. Barrett, John King, Dong-Hyun Kim

784 **Software:** Claudio Tomi-Andrino, Rupert Norman, Thomas Millat

785 **Supervision:** Klaus Winzer, David A. Barrett, John King, Dong-Hyun Kim

786 **Writing – original draft:** Claudio Tomi-Andrino

787 **Writing – review & editing:** Claudio Tomi-Andrino, Rupert Norman, Thomas Millat,

788 Philippe Soucaille, Klaus Winzer, David A. Barrett, John King, Dong-Hyun Kim

789



790 **Supporting information**

- 791 **S1 Appendix.** Energetic requirements and determination of analytical conditions.
- 792 **S2 Appendix.** Max-min driving force linear program in Python.
- 793 **S1 Dataset.** Dictionary of metabolites (*T. thermophilus*).
- 794 **S2 Dataset.** Metabolomics Keio database (*E. coli*).
- 795 **S3 Dataset.** Dictionary of metabolites (*E. coli* - from matTFA to eQuilibrator).
- 796 **S4 Dataset.** Results of the mod-matTFA analysis for *E. coli*.
- 797 **S5 Dataset.** Results of the mod-matTFA analysis for *T. thermophilus*.
- 798 **S6 Dataset.** Correlation coefficients of MDF-derived metabolite concentration values.
- 799 **S1 Table.** Mapping of metabolic fluxes (*E. coli*).
- 800 **S2 Table.** Mapping of metabolic fluxes (*T. thermophilus*).
- 801 **S3 Table.** List of files used in this study.
- 802 **S4 Table.** Full factorial design (*E. coli*).
- 803 **S5 Table.** Full factorial design (*T. thermophilus*).
