1 **Physicochemical and metabolic constraints for thermodynamics-**  
2 **based stoichiometric modelling under mesophilic growth**  
3 **conditions**

4

5 Claudio Tomi-Andrino<sup>1,2,3</sup>, Rupert Norman<sup>2</sup>, Thomas Millat<sup>2</sup>, Philippe Soucaille<sup>2,4,5,6</sup>,  
6 Klaus Winzer<sup>2</sup>, David A. Barrett<sup>1</sup>, John King<sup>3</sup>, Dong-Hyun Kim<sup>1\*</sup>

7

8 <sup>1</sup>Centre for Analytical Bioscience, Advanced Materials and Healthcare Technologies  
9 Division, School of Pharmacy, University of Nottingham, Nottingham, United Kingdom.

10 <sup>2</sup>Nottingham BBSRC/EPSRC Synthetic Biology Research Centre (SBRC), School of Life  
11 Sciences, BioDiscovery Institute, University of Nottingham, Nottingham, United Kingdom.

12 <sup>3</sup>Nottingham BBSRC/EPSRC Synthetic Biology Research Centre (SBRC), School of  
13 Mathematical Sciences, University of Nottingham, Nottingham, United Kingdom.

14 <sup>4</sup>INSA, UPS, INP, Toulouse Biotechnology Institute, (TBI), Université de Toulouse,  
15 Toulouse, France.

16 <sup>5</sup>INRA, UMR792, Toulouse, France.

17 <sup>6</sup>CNRS, UMR5504, Toulouse, France.

18

19

20 \*Corresponding author

21 Email: [dong-hyun.kim@nottingham.ac.uk](mailto:dong-hyun.kim@nottingham.ac.uk)

22

23 **Abstract**

24 Metabolic engineering in the post-genomic era is characterised by the development of new  
25 methods for metabolomics and fluxomics, supported by the integration of genetic engineering  
26 tools and mathematical modelling. Particularly, constraint-based stoichiometric models have  
27 been widely studied: (i) flux balance analysis (FBA) (*in silico*), and (ii) metabolic flux  
28 analysis (MFA) (*in vivo*). Recent studies have enabled the incorporation of thermodynamics  
29 and metabolomics data to improve the predictive capabilities of these approaches. However,  
30 an in-depth comparison and evaluation of these methods is lacking. This study presents a  
31 thorough analysis of two different *in silico* methods tested against experimental data  
32 (metabolomics and <sup>13</sup>C-MFA) for the mesophile *Escherichia coli*. In particular, a modified  
33 version of the recently published matTFA toolbox was created, providing a broader range of  
34 physicochemical parameters. Validating against experimental data allowed the determination  
35 of the best physicochemical parameters to perform the TFA (Thermodynamics-based Flux  
36 Analysis). An analysis of flux pattern changes in the central carbon metabolism between <sup>13</sup>C-  
37 MFA and TFA highlighted the limited capabilities of both approaches for elucidating the  
38 anaplerotic fluxes. In addition, a method based on centrality measures was suggested to  
39 identify important metabolites that (if quantified) would allow to further constrain the TFA.  
40 Finally, this study emphasised the need for standardisation in the fluxomics community:  
41 novel approaches are frequently released but a thorough comparison with currently accepted  
42 methods is not always performed.

43 **Keywords**

44 Constraint-based modelling, fluxomics, metabolomics, thermodynamics, centrality measures.

45 **Author summary**

46 Biotechnology has benefitted from the development of high throughput methods  
47 characterising living systems at different levels (e.g. concerning genes or proteins), allowing  
48 the industrial production of chemical commodities. Recently, focus has been placed on  
49 determining reaction rates (or metabolic fluxes) in the metabolic network of certain  
50 microorganisms, in order to identify bottlenecks hindering their exploitation. Two main  
51 approaches are commonly used, termed metabolic flux analysis (MFA) and flux balance  
52 analysis (FBA), based on measuring and estimating fluxes, respectively. While the influence  
53 of thermodynamics in living systems was accepted several decades ago, its application to  
54 study biochemical networks has only recently been enabled. In this sense, a multitude of  
55 different approaches constraining well-established modelling methods with thermodynamics  
56 has been suggested. However, physicochemical parameters are generally not properly  
57 adjusted to the experimental conditions, which might affect their predictive capabilities. In  
58 this study, we have explored the reliability of currently available tools by investigating the  
59 impact of varying said parameters in the simulation of metabolic fluxes and metabolite  
60 concentration values. Additionally, our in-depth analysis allowed us to highlight limitations  
61 and potential solutions that should be considered in future studies.

62

## 63 Introduction

64 Metabolic engineering aims to improve microbial strains by considering comprehensive  
65 metabolic pathways in their entirety rather than overexpressing a single gene (1). To improve  
66 the strains, hypothesis-driven studies have attempted to rationally identify gene targets and to  
67 evaluate the effects of those changes in the network (2, 3). However, the complex nature of  
68 cellular metabolism and its regulation demands a holistic understanding, i.e. a data-driven  
69 approach (1-3). Combining metabolic engineering with systems biology and mathematical  
70 modelling allows for an optimisation of entire cellular networks considering further  
71 downstream processes at early stages (4).

72 This systematic framework exploits information regarding the metabolic state, which  
73 comprises the metabolome (complete set of low-molecular-weight metabolites (<1.5 kDa))  
74 and the fluxome (or metabolic activity, distribution of rates of conversion/transport in the  
75 metabolic network) (5, 6). Kinetic modelling can yield metabolic fluxes from metabolomics  
76 data, but lack of high-quality enzymatic parameters and computational limitations (e.g. time-  
77 consuming processes) hinder its application (7-9). Performing an elementary flux mode  
78 analysis (EFMA) to decompose the metabolic network into minimal subsets allowing to  
79 maintain the steady state provides useful information (10). However, the combinatorial  
80 explosion makes the algorithm computationally expensive and therefore limits the size of the  
81 network that can be analysed (10, 11). Alternatively, stoichiometric modelling can provide a  
82 flux distribution for larger networks without any kinetic or metabolomics information (12).  
83 Briefly, a metabolic (quasi) steady state for intracellular concentration values ( $C$ ) is assumed,  
84 so that the stoichiometric matrix ( $S$ ) (including the stoichiometric coefficients of metabolites  
85 in each reaction of the metabolic network) constrains the set of metabolic fluxes ( $v$ ) (13):

$$\frac{dC}{dt} = S \times v \cong 0 \quad (1)$$

86 Two main approaches to solve this equation can be found: (i) flux balance analysis  
87 (FBA), normally applied to large models (genome-scale model, GSM) (14) or (ii) metabolic  
88 flux analysis (MFA), used for smaller metabolic networks (mainly the central carbon  
89 metabolism) (Table 1). FBA solves the underdetermined system represented in Eq. 1 by  
90 maximising or minimising the value of an assumed objective function (14). A plethora of  
91 different objectives has been described in the literature (15). Three of them can be  
92 highlighted: maximisation of biomass yield ( $Y_{X/S}$ , equal to the ratio growth rate/substrate  
93 uptake rate), maximisation of ATP yield, and minimisation of sum of fluxes, which have

94 been suggested to compete in the regulation of bacterial metabolism (16). Hence, selecting an  
95 adequate one/multi-dimensional objective function when analysing a GSM will depend on  
96 the growth conditions to be simulated in FBA. In general, measured extracellular metabolic  
97 rates (e.g. substrate uptake) are insufficient to properly constrain the intracellular metabolic  
98 fluxes (13). In contrast, MFA is based on a least-squares-regression problem, normally solved  
99 by exploiting experimental mass isotopomer distribution (MID) of proteinogenic amino acids  
100 ( $^{13}\text{C}$ -MFA) (13). Since this approach requires fewer assumptions and uses more experimental  
101 information than FBA,  $^{13}\text{C}$ -MFA is considered to be the *gold standard* in fluxomics (17).  
102 However, current applicability (central carbon metabolism), and technical/computational  
103 complexity (particularly for autotrophic growth (18)) limit its usage.

104 The set of constraints characterising stoichiometric modelling approaches (Eq. 1) is  
105 insufficient to guarantee thermodynamically feasible results in the flux solution space (19,  
106 20). Both FBA and  $^{13}\text{C}$ -MFA assume most reactions to be reversible (13, 21): in the first case  
107 directionalities are dictated by the optimal flux distribution (which depends on the *a priori*  
108 chosen objective function (14)), whereas in  $^{13}\text{C}$ -MFA they are determined by the MIDs (22).  
109 The flux-force relationship (thermodynamic displacement from the equilibrium (23)) links  
110 thermodynamic potentials and fluxes (Eq. 2):

$$\Delta_r G' = \Delta_r G'^o + RT \ln Q = RT \ln(Q/k_{eq}) = -RT \ln(J^+/J^-) \quad 2)$$

111 where  $\Delta_r G'$  and  $\Delta_r G'^o$  are the Gibbs free energies of reactions (the latter referring to adjusted  
112 standard conditions),  $Q$  and  $k_{eq}$  are the ratio of products to reactant concentrations or  
113 activities (the latter at equilibrium) and  $(J^+/J^-)$  is the relative forward-to-backward flux (22).

114 Four main approaches exploiting thermodynamics data can be highlighted: (i) energy  
115 balance analysis (EBA), where pre-selecting  $\Delta_r G'$  bounds leads to biased results (24),  
116 (ii) network-embedded thermodynamic (NET) analysis, that needs pre-assigned  
117 directionalities (e.g. obtained by FBA) and evaluates the thermodynamic consistency (25),  
118 (iii) max-min driving force (MDF), which needs a flux distribution as input data to predict  
119 metabolite concentration values (26), and (iv) thermodynamically-constrained FBA. Two  
120 methods were developed in the latter approach: thermodynamics-based flux analysis (TFA),  
121 and an optimization problem allowing to obtain a thermodynamically flux-minimised  
122 (TR-fluxmin) solution. TFA directly yields a thermodynamically feasible FBA solution (e.g.  
123 by maximising  $Y_{X/S}$ ) and simulates metabolomics data (20, 27). In contrast, TR-fluxmin is

Predictive capabilities of thermodynamics-based stoichiometric approaches

124 based on the minimisation of sum of fluxes in the system whilst applying a penalty score for  
 125 *in silico* metabolite concentration values (21). Other recent approaches are based on  
 126 alternative constraints, such as setting an upper limit on the Gibbs energy dissipation rate  
 127 (28), or only provide information regarding reaction directionalities (29). With regards to  
 128 EFMA, even though using thermodynamics reduces the aforementioned limitations due to  
 129 combinatorial explosion, the network size is still a limiting factor (30).

130 MDF and TFA are generally performed using eQuilibrator (26) and matTFA (20),  
 131 respectively. Since matTFA can be directly used to analyse a GSM, it was selected for this  
 132 study. Three features should be highlighted: (i) unique values for temperature (25 °C) are  
 133 considered, (ii) salinity (S) is not taken into account when calculating parameter A, and (iii)  
 134 Gibbs free energy values are adjusted for ionic strength (I) using the extended Debye-Hückel  
 135 equation (Table 1). In this sense, it should be noted that the cytosol of *E. coli* is normally in  
 136 the interval 0.15 – 0.20 M (27) (and so, salinity is not null), and the fact that the  
 137 extended Debye-Hückel equation is only valid for  $I < 0.1$  M (31).

138 **Table 1. Comparison of frequently used approaches in fluxomics.** Parameter A is used in the extended  
 139 Debye-Hückel equation.

|                                                       | <sup>13</sup> C-MFA          | FBA       | TFA                            |
|-------------------------------------------------------|------------------------------|-----------|--------------------------------|
| Metabolic network size                                | small                        | GSM       | GSM                            |
| Flux distribution                                     | generated                    | generated | generated                      |
| Uptake rate                                           | Yes                          | Yes       | Yes                            |
| Specific growth rate, $\mu$ (h <sup>-1</sup> )        | -                            | Yes       | Yes                            |
| Gibbs free energy of formation ( $\Delta G_f^\circ$ ) | -                            | -         | Experimental (32), or GCM (33) |
| Temperature, $t$ (°C)                                 | -                            | -         | 25                             |
| Ionic strength, $I$ (M)                               | -                            | -         | 0.25                           |
| Salinity, S (g/kg)                                    | -                            | -         | -                              |
| Adjustment method                                     | -                            | -         | Extended Debye-Hückel          |
| Parameter A                                           | -                            | -         | T-dependent                    |
| Metabolite concentration values                       | -                            | -         | Constraint or predicted        |
| Problem formulation                                   | least square regression (13) | LP (14)   | MILP (20)                      |

140 <sup>13</sup>C-MFA, <sup>13</sup>C metabolic flux analysis; **FBA**, flux balance analysis; **GCM**, group contribution method;  
 141 **GSM**, genome-scale model; **LP**, linear programming; **MILP**, mixed-integer linear programming;  
 142 **TFA**, thermodynamics-based flux analysis.

143 This study was based on determining the impact of varying and adjusting the  
 144 physicochemical parameters ( $t$ ,  $I$  and  $S$ ) on the predictive capabilities of TFA under  
 145 mesophilic growth conditions. In order to do so, a modified matTFA was developed by

Predictive capabilities of thermodynamics-based stoichiometric approaches

146 increasing the number of parameters and parameter values that were originally considered  
147 (20). To validate the results, a comparison with published  $^{13}\text{C}$ -MFA and metabolomics data  
148 was performed. In particular, flux pattern changes between *in vivo* and *in silico* fluxes in the  
149 central carbon metabolism were analysed, with a focus on the anaplerotic reactions. In  
150 addition, a method based on centrality measures was suggested to identify important  
151 metabolites that (if quantified) would allow to further constrain the TFA.

152

153

## 154 **Materials and methods**

### 155 **Metabolic network, mapping of metabolic fluxes and experimental data**

156 Mesophilic growth conditions were studied by selecting a GSM for *Escherichia coli*  
157 (str. K-12 substr. MG1655): *iJO1366*, which has proven to predict phenotypes in a wide  
158 range of growth conditions (34). For the sake of consistency, metabolomics and fluxomics  
159 data were obtained from the same experiment (S1 Dataset and S1 Table) (35). Briefly, cells  
160 were grown in glucose-limited chemostats at 37 °C with minimal medium and a fixed specific  
161 growth rate ( $\mu$ ) of 0.20 h<sup>-1</sup>. The experimental glucose uptake rate (2.93 mmol gDCW<sup>-1</sup> h<sup>-1</sup>)  
162 was used as a constraint, leaving the default lower and upper bounds for transport reactions.  
163 Maximisation of the biomass yield was selected as the objective function, and no flux value  
164 was forced through the biomass reactions ( $v_{\text{biomass}}$ ). Directionalities of resulting flux values  
165 from TFA were compared on a reaction-by-reaction case against *in vivo* fluxes from <sup>13</sup>C-  
166 MFA, for which a mapping and directionality correction step was needed (S1 Table).

167

### 168 **Generation of experimental design**

169 The original matTFA toolbox uses unique values for  $t$  and  $I$  (20), and  $S$  is not taken into  
170 account (Table 1). To explore their potential impact in the predictive capabilities, a modified  
171 matTFA (mod-matTFA) allowing to consider alternative parameters values and methods was  
172 created (Table 2). For the sake of reproducibility (36), the complete list of files used in this  
173 study was collected in S2 Table, and are publicly available in *Nottingham SBRC's* GitHub  
174 profile (<https://github.com/SBRCNottingham/Impact-of-Physicochemical-Parameters-on-thermodynamics-based-FBA>). Analyses were performed using the COBRA toolbox (37) in  
175  
176 MATLAB R2016b with the solver CPLEX 12.8.0 to ensure compatibility.

177

178 **Table 2. Factors considered in mod-matTFA.** Values 0/1 refer to the binary codification for the full factorial  
179 design (S3 Table). In total, 2<sup>6</sup> combinations were tested.

|                          |                                                             |
|--------------------------|-------------------------------------------------------------|
| Temperature, $t$ (°C)    | (0): 25<br>(1): 37                                          |
| Ionic strength, $I$ (M)  | (0): 0<br>(1): 0.25                                         |
| Salinity, $S$ (g/kg)     | (0): 0<br>(1): 13.74                                        |
| Adjustment method        | (0): Extended Debye-Hückel equation<br>(1): Davies equation |
| Parameter $A$            | (0): T-dependent*<br>(1): T,S-dependent                     |
| Metabolite concentration | (0): Default matTFA                                         |



|        |                        |
|--------|------------------------|
| values | (1): experimental data |
|--------|------------------------|

180 \* $T$  is temperature in K. There is a ‘default matTFA’ constraint regarding set concentrations values for cofactors  
 181 (AMP, ADP and ATP) as included in the original matTFA code. ‘Experimental data’ refers to the use of  
 182 published metabolomics data (S2 Dataset), setting the lower and upper bound for the simulation as 90-110% of  
 183 the concentration values.

184

185 Since  $I$  affects the Gibbs energy of formation, an adjustment from the reference state  
 186 ( $\Delta_f G_j^o$ ) was needed to obtain the standard transformed Gibbs energy of formation ( $\Delta_f G_j'^o$ )  
 187 (32). In the original matTFA (20) and other studies (26, 28) the extended Debye-Hückel  
 188 equation was used to adjust the Gibbs free energy values, with a proven validity for  $I < 0.1$  M  
 189 (31) (Eq. 3). The parameter  $B$  was assumed to be constant, with a value of  $1.6 \text{ mol}^{-1/2} \text{ L}^{1/2}$  (27,  
 190 32). Mod-matTFA also explored the impact of using the Davies equation ( $\beta = 0.3$ ) (Eq. 4) as  
 191 an alternative adjustment approach, with a tested validity for  $I < 0.5$  M (31).

$$\Delta_f G_j'^o(I) = \Delta_f G_j^o + N_H(j)RT \ln(10)\text{pH} - RT \left( \frac{A\sqrt{I}}{1 + B\sqrt{I}} \right) (z_j^2 - N_H(j)) \quad (3)$$

$$\Delta_f G_j'^o(I) = \Delta_f G_j^o + N_H(j)RT \ln(10)\text{pH} - RT \left( \frac{A\sqrt{I}}{1 + \sqrt{I}} - \beta I \right) (z_j^2 - N_H(j)) \quad (4)$$

192 Both formulas include terms correcting the pH and  $I$ , where  $N_H(j)$  is the number of  
 193 hydrogen atoms in species  $j$ ,  $R$  is the gas constant,  $T$  is the absolute temperature and  $z_j$  refers  
 194 to the charge of the species (32). Applying the Gibbs-Helmholtz equation would be necessary  
 195 to account for temperature different from standard conditions, i.e. 25 °C, but the lack of  
 196 measured changes in enthalpy ( $\Delta H^o$ ) for all the metabolites prevents from doing so (38).  
 197 Hence, variations from 25 °C to 37 °C were assumed to be small, as shown elsewhere (39).  
 198 The parameter  $A$  is normally assumed to be constant (27) or calculated using a  
 199 temperature-dependent function (Eq. 5) (20, 26), and the impact of using a  
 200 temperature/salinity-dependent function (Eq. 6) (38) was also tested in this study (Fig. 1).

$$A (\text{mol}^{-1/2} \text{ kg}^{1/2}) = 1.10708 - 1.54508 \times 10^{-3} T + 5.95584 \times 10^{-6} T^2 \quad (5)$$

$$A (\text{mol}^{-1/2} \text{ kg}^{1/2}) = \frac{F^3 \sqrt{2\epsilon_0 R^3}}{4\pi\epsilon_0 N_A} \times \left( \frac{\rho_{sw}(t, S)}{(\epsilon_{sw}(t, S) T)^3} \right)^{1/2} \quad (6)$$

201 where the first term in Eq. (6) includes physical constants (Faraday’s constant ( $F$ ), vacuum  
 202 permittivity ( $\epsilon_0$ ), gas constant ( $R$ ) and Avogadro’s constant ( $N_A$ )), and the second the  
 203 temperature ( $T$  in K and  $t$  in °C), and salinity ( $S$ ) dependent functions to calculate the density  
 204 ( $\rho_{sw}$ ) (40) and the relative permittivity ( $\epsilon_{sw}$ ) (41) for seawater (S2 Table).

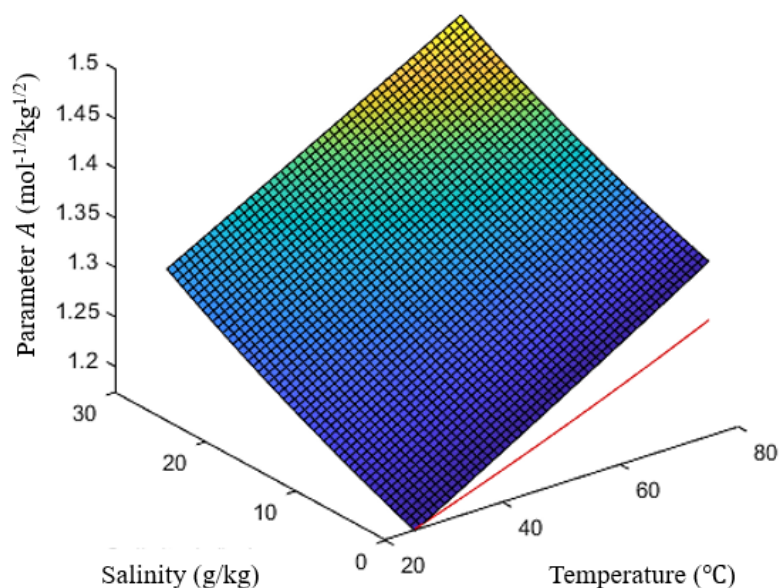

205

206 **Fig. 1. Calculation of the parameter A.** The red line refers to the temperature-dependent function (Eq. 5),  
207 whereas the surface is the temperature/salinity-dependent function (Eq. 6).

208 In general, consistency in units between parameters  $A$  (mol<sup>-1/2</sup>kg<sup>1/2</sup>) and  $B$  (mol<sup>-1/2</sup>L<sup>1/2</sup>)  
209 is achieved by assuming 1 kg = 1 L. In this study, an expression for seawater (Eq. 7) (42) was  
210 used to estimate a salinity value by considering a buoyant density ( $\rho$ ) for bacterial cells of  
211 1.11 kg/L (43). For  $I$ , a value of 0.25 M was used (Table 2).

$$I(\text{M}) \times \rho(\text{kg/L}) = \frac{19.92 \times S}{1000 - 1.005 \times S} \quad (7)$$

212

### 213 **Assessment of fluxomics and metabolomics predictive capabilities**

214 Mesophilic growth conditions for *E. coli* were selected as a case study to explore the impact  
215 of metabolic and physiochemical constraints on the predictive capabilities of TFA at the  
216 fluxomics and metabolomics level. Accordingly, 64 different factor combinations (Table 2)  
217 were tested using mod-matTFA. It is important to note that not all test yielded a solution  
218 where cell growth was achieved (i.e.  $v_{\text{biomass}} > 0$  mmol gDCW<sup>-1</sup> h<sup>-1</sup>). Since different factor  
219 combinations converged into the same set of solutions, tests were characterised at the  
220 fluxomics and metabolomics levels by considering either the full set of values, or the subset  
221 with an experimental counterpart.

222 Results yielding feasible solutions were also compared against <sup>13</sup>C-MFA flux values  
223 (S1 Table) and experimental metabolomics data (S1 Dataset), respectively. A goodness-of-fit  
224 analysis based on the Pearson correlation coefficient ( $r$ ) was performed, as shown in (44). In  
225 order to identify the test(s) with the best predictive capabilities at both levels, they were

226 separately ranked according to two criteria: (i) correlation coefficient at the fluxomics level,  
227 and (ii) correlation coefficient at the metabolomics level. The concordance between results  
228 was assessed by the Kendall's  $W$  statistics (S2 Table), where a value of 0 means no  
229 agreement of ranking position with respect to each criterion, and a value of 1 indicates total  
230 agreement. This statistics is a normalisation of the Friedman test, which simply tests whether  
231 samples are from the same population or not (45). Finally, a joint ranking after weighting the  
232 ranking position according to each criterion was considered (the higher the score, the better  
233 the correlation in both the fluxomics and metabolomics levels).

234

### 235 **Thermodynamics-enriched network analysis**

236 The constraining capacity of metabolites is not uniform, and depends on their connectivity in  
237 the network (20, 46). To further constrain the model, a priority list of metabolites to be  
238 quantified should be considered when designing the metabolomics protocol. In this study, the  
239 suitability of the selected dataset for this purpose was analysed (S1 Dataset). The importance  
240 of each metabolite in the network was measured by means of PageRank as implemented in  
241 MATLAB. This algorithm was developed by Google (47) and has been recently applied to  
242 metabolic networks (48). In this sense, the presence of over-represented metabolites (e.g.  
243 proton donor) biases centrality measures (48). Therefore, a removal of these *currency* (49),  
244 *side* (48) or *pool* (50) metabolites from the network was performed (S1 Appendix).

245 Non-redundant flux distributions from TFA were selected and subjected to network  
246 simplification and correction. Briefly, only active metabolites and reactions were kept, and  
247 stoichiometric coefficients were corrected so that they reflected the flux direction of each  
248 reaction. Centrality measures require a graph  $G$ , defined as a pair  $G = (V, E)$ , where the  
249 vertices (or nodes)  $V$  are the metabolites, and the edges  $E$  the reactions connecting them. The  
250 stoichiometric matrix was converted into an adjacency matrix using an in-house script  
251 (S1 Appendix), which was later used to generate a  $G$  ready for the PageRank analysis. The  
252 final lists of metabolites were ranked by their centrality score, and the top 50% compared  
253 against the list of available experimental values.

254

255

## 256 **Results and discussion**

257 In the last two decades, biotechnology and systems biology have benefitted from the  
258 development of  $^{13}\text{C}$ -MFA and FBA to measure and estimate intracellular metabolic fluxes in  
259 industrially relevant bacteria. Although the influence of thermodynamics in living systems  
260 has been considered for several decades, its application to study biochemical networks has  
261 been only recently enabled (24, 32). In this sense, a multitude of different approaches  
262 constraining well-established modelling approaches with thermodynamics have been  
263 suggested. Given its relevance, this study focused on analysing TFA (performed by matTFA  
264 toolbox (20)). This study aimed at: (i) assessing and improving TFA's reliability of predicting  
265 metabolic fluxes and metabolite concentration values, and (ii) identifying important  
266 metabolites to further constrain the model. In order to do so, (i) the published matTFA  
267 toolbox was modified to include a broader range of parameters (and parameter values) as well  
268 as alternative equations and constraints (Table 2), and (ii) an in-house script was developed to  
269 perform a GSM-wide network analysis exploiting TFA-derived reaction directionalities.

270

### 271 **Evaluation of the reliability of predicted flux and concentration values**

272 A full factorial design comprising  $2^6$  tests (Table 2) was applied in TFA to constrain the GSM  
273 *iJO1366* (34), selecting the maximisation of biomass yield as the objective function. An  
274 experimental glucose uptake rate was set ( $2.93 \text{ mmol gDCW}^{-1} \text{ h}^{-1}$ ), reaching a  $\mu \approx 0.28 \text{ h}^{-1}$   
275 (the experimental was  $0.20 \text{ h}^{-1}$ ) for all FBA and TFA tests. Overall, 26/64 tests were  
276 unsuccessful (no cell growth), and the remaining 38/64 converged into common optimal  
277 solutions (S4 Table). At the fluxomics level, a single flux distribution was achieved in FBA  
278 for all tests, whereas for TFA a different number of non-redundant solutions were found: 5  
279 (when considering all reactions) or 4 (only those with an experimental counterpart).  
280 Likewise, at the metabolomics level, the 38 tests were reduced to 9 optimal solutions. Results  
281 were tested against available experimental data ( $^{13}\text{C}$ -MFA (35, 51) and metabolomics (35))  
282 by calculating the Pearson correlation coefficient. Therefore, each successful test was  
283 characterised by the optimal solutions it achieved and the correlation coefficients at both the  
284 fluxomics and metabolomics levels.

285 The importance of each factor was assessed by means of decision trees (CART® in  
286 Minitab 19) (Table 3). Briefly, models were built considering categorical predictors (the  
287 factors after the codification (S3 Table)) and responses: the importance of a factor measured  
288 the improvement on the model when using it to split the data. Accordingly, the relative

Predictive capabilities of thermodynamics-based stoichiometric approaches

289 importance was calculated with respect to the best predictor (Table 3). The  $I$  (M) was the top  
 290 one for all responses except for *TFA (full)*, where it equalised  $t$  (°C) at 95.7 % and was  
 291 second to the adjustment method. In all cases, using either default concentrations values for  
 292 AMP, ADP and ATP (as included in the original matTFA), or experimental data made no  
 293 difference. As a result, tests only differing in this factor showed the same correlations with  
 294 experimental data (Table 4).

295 **Table 3. Relative factor importance.** The type of analysis depended on the nature of the response:  
 296 *classification* was selected for TFA (full), TFA (match <sup>13</sup>C-MFA), concentration values (full) and concentration  
 297 values (match experimental), and *regression* for  $r$  (fluxomics) and  $r$  (metabolomics). The former was suited for  
 298 categorical responses (i.e. which solution is achieved, as shown in S4 Table), and the latter for continuous  
 299 responses (for Pearson's  $r$ , from -1 to +1).

|                   | TFA (full) | TFA (match <sup>13</sup> C-MFA) | Concentration values (full) | Concentration values (match exp) | $r$ (fluxomics) | $r$ (metabolomics) |
|-------------------|------------|---------------------------------|-----------------------------|----------------------------------|-----------------|--------------------|
| $t$ (°C)          | 95.7       | 50.0                            | 50.0                        | 50.0                             | 29.8            | 60.4               |
| $I$ (M)           | 95.7       | 100.0                           | 100.0                       | 100.0                            | 100.0           | 100.0              |
| $S$ (g/kg)        | 19.9       | 7.8                             | 27.5                        | 27.5                             | -               | -                  |
| Parameter $A$     | -          | 1.0                             | 50.0                        | 50.0                             | 2.6             | -                  |
| Adjustment method | 100.0      | 52.1                            | 44.4                        | 44.4                             | 52.3            | 0.9                |
| [met]             | -          | -                               | -                           | -                                | -               | -                  |

300

301 Correlation coefficients for FBA in all tests was  $r \approx 0.02$ , whereas for TFA it varied  
 302 within the range from 0.90 to 0.95. A reaction-by-reaction comparison of flux directionalities  
 303 in central metabolism showed inherent differences between <sup>13</sup>C-MFA and FBA/TFA, as  
 304 discussed in the last section of this study. At the metabolomics level, it ranged from 0.08 to  
 305 0.18 (S4 Table). Tests were ranked independently by both criteria, showing a notable  
 306 agreement in their positions (Kendall's  $W \approx 0.81$ ). Scoring the position according to each  
 307 criterion allowed creating a joint ranking to identify the test(s) with the best predictive  
 308 capability at both levels (Table 4). Four tests held the first position, since they all converged  
 309 into the same optimal solutions (S4 Table). Specifically,  $t = 37$  °C,  $I = 0.25$  M and the Davies  
 310 equations as adjustment method were used. Following the relative factor importance  
 311 (Table 3), correlation coefficients were not affected by  $S$  and the selection of concentrations  
 312 values.

313 **Table 4. Tests with the highest score in the joint ranking.** The full list is available in (S4 Table). \*(run #3)  
 314 reflects the conditions used in the original matTFA.  
 315

|                                                                                     |      |    |    |    |      |    |      |    |    |      |    |
|-------------------------------------------------------------------------------------|------|----|----|----|------|----|------|----|----|------|----|
| Rank sum                                                                            | 62.5 |    |    |    | 59.5 |    | 56.5 |    |    | 51.5 |    |
| Correlation coefficient<br>TFA vs. <sup>13</sup> C-MFA                              | 0.95 |    |    |    | 0.95 |    | 0.90 |    |    | 0.90 |    |
| Correlation coefficient metabolomics                                                | 0.18 |    |    |    | 0.17 |    | 0.17 |    |    | 0.15 |    |
| Run number                                                                          | 20   | 24 | 52 | 56 | 28   | 60 | 32   | 64 | 12 | 44   | 3* |
| <i>t</i> (°C)<br>(0 = 25, 1 = 37)                                                   | 1    | 1  | 1  | 1  | 1    | 1  | 1    | 1  | 1  | 1    | 0  |
| <i>I</i> (M)<br>(0 = 0, 1 = 0.25)                                                   | 1    | 1  | 1  | 1  | 1    | 1  | 1    | 1  | 1  | 1    | 1  |
| <i>S</i> (g/kg)<br>(0 = 0, 1 = 13.74)                                               | 0    | 1  | 0  | 1  | 0    | 0  | 1    | 1  | 0  | 0    | 0  |
| Parameter <i>A</i><br>(0 = <i>t</i> -dependent, 1 = <i>t</i> / <i>S</i> -dependent) | 0    | 0  | 0  | 0  | 1    | 1  | 1    | 1  | 1  | 1    | 0  |
| Adjustment method<br>(0 = DH, 1 = Davies)                                           | 1    | 1  | 1  | 1  | 1    | 1  | 1    | 1  | 0  | 0    | 0  |
| [met] (0 = default, 1 = experimental values)                                        | 0    | 0  | 1  | 1  | 0    | 1  | 0    | 1  | 0  | 1    | 0  |

316 **Davies**, Davies equation; **DH**, extended Debye-Hückel equation; **[met]**, metabolite concentration values. Values  
 317 of 0 and 1 in the headers refer to the binary codification from the full factorial design (S3 Table). \*Run #3  
 318 represents the analytical conditions from the original matTFA, added here as a reference. There is a ‘default  
 319 matTFA’ constraint regarding set concentrations values for AMP, ADP and ATP, as included in the original  
 320 matTFA script. ‘Experimental values’ refers to the use of published metabolomics data (S1 Dataset). Correlation  
 321 coefficient values were rounded to the closest integer for ranking purposes.  
 322

323 This analysis showed that adjusting the physicochemical parameters to the  
 324 experimental conditions did improve the predictive capabilities of TFA, but certain technical  
 325 limitations at both levels need to be discussed. The nature of <sup>13</sup>C-MFA only allows  
 326 determining the flux distribution in the central carbon metabolism by considering amino acid  
 327 synthesis (13), which has been noted to be very robust against changes in the intermediate  
 328 metabolite concentrations (52, 53). The recent discovery of non-enzymatic metabolism-like  
 329 reactions suggests that current metabolic networks evolved from prebiotic reaction  
 330 sequences. Therefore, a well-established flux distribution in the central pathways can be  
 331 expected (54). In order to discern among tests, focus on highly variable flux values should be  
 332 promoted, but the variance among them was low (S2 Dataset). In fact, only 36/1679 showed a  
 333 variance greater than zero, where 6 reactions had an experimental counterpart to compare  
 334 against. Optimal solutions for all tests were similar (reducing the discerning capacity), which  
 335 explained the overall high correlation coefficients for all tests. Therefore, results from the  
 336 comparison of predicted and experimental metabolite concentration values are paramount to  
 337 better understand the impact of varying the physicochemical parameters.

338 Regarding the metabolomics level, the 9 non-redundant solutions were subjected to a  
 339 similar analysis. Likewise, only 46/972 metabolites had a variance among tests greater than

340 zero (S3 Dataset), out of which 7 were quantified: L-aspartate, phosphoenolpyruvate, ATP,  
341 L-valine, pyruvate, NADP<sup>+</sup>, and FAD. Reliable quantitation of energy-carrying molecules  
342 and redox cofactors is not easily achievable, given the inherent cell dynamics (e.g. cell cycle  
343 and cell size variations) and degradation during extraction (55-63). Since the correlation  
344 coefficients were calculated using a dataset blind to highly variable metabolites (e.g.  
345 3-phosphohydroxypyruvate ranged four orders of magnitude), resulting values were similar  
346 for different factor combinations (Table 4). Thus, said metabolites should be quantified to  
347 deconvolute the impact of using default or experimental concentration values in the  
348 predictive capabilities.

349 Other limitations refer to the design of the tool itself. This method does not consider  
350 other complex phenomena affecting the thermodynamic feasibility of metabolic pathways,  
351 such as Mg complexation with metabolites, or compound dissociation into more than two  
352 protonated species (19, 20) (as shown in the file *calcDGspecies.m*). In addition, Gibbs free  
353 energy values are relaxed when no feasible solution is found, so the constraining power of  
354 experimental metabolite concentration values is reduced (20). Related to this, an approach  
355 allowing to identify metabolites to further constrain the model was developed in this study  
356 (next section). Finally, it should be noted that to apply matTFA to thermophilic species (e.g.  
357 *Thermus thermophilus*, a potential non-model metabolic engineering platform (64)), recent  
358 methods to adjust Gibbs free energies to high temperatures should be considered (65).

359

#### 360 **Identification of central metabolites to further constrain the model**

361 Successful tests converged into 5 solutions at the fluxomics level (S4 Table), which are  
362 structurally equivalent. Therefore, a single stoichiometric matrix was considered for further  
363 analysis. After the simplification step (removal of inactive metabolites and reactions, as well  
364 as side compounds) 622/1805 metabolites were left in the network. The experimental dataset  
365 included information about 44 metabolites (S1 Dataset), out of which 34 were also  
366 considered in the simplified network, and the rest was discarded as side compounds.

367 PageRank scores were calculated, allowing to identify metabolites in the top 50% for  
368 which experimental data was available (Table 5). Overall, 18/34 quantified metabolites were  
369 in the top 50%, with only 7 in the top 10%. The lack of high centrality for most metabolites  
370 explains the aforementioned result, where tests only differing in the set of concentrations  
371 values used as a constraint (default ATP/ADP/AMP or experimental) led to the same optimal  
372 solution (e.g. tests 20 and 52, Table 3).

373 **Table 5. Quantified metabolites in the top 50% of PageRank (PR) based analysis.** The last position in the  
 374 ranking (#622) was L-Tyrosine (PR score = 0.0004), which had been quantified. The full list can be found in  
 375 (S4 Dataset).

| Quantile | Ranking position | Metabolite                  | Node     | PR score |
|----------|------------------|-----------------------------|----------|----------|
| 10%      | 1                | L-Glutamate                 | glu-L_c  | 0.0172   |
|          | 2                | Pyruvate                    | pyr_c    | 0.0126   |
|          | 4                | D-Fructose 6-phosphate      | f6p_c    | 0.0079   |
|          | 6                | Acetyl-CoA                  | accoa_c  | 0.0071   |
|          | 7                | L-Methionine                | met-L_c  | 0.0071   |
|          | 23               | Succinyl-CoA                | succoa_c | 0.0046   |
|          | 44               | L-Serine                    | ser-L_c  | 0.0034   |
| 30%      | 69               | Dihydroxyacetone phosphate  | dhap_c   | 0.0029   |
|          | 70               | L-Tryptophan                | trp-L_c  | 0.0029   |
|          | 88               | Phosphoenolpyruvate         | pep_c    | 0.0026   |
|          | 103              | S-Adenosyl-L-methionine     | amet_c   | 0.0024   |
|          | 129              | L-Alanine                   | ala-L_c  | 0.0021   |
|          | 157              | L-Histidine                 | his-L_c  | 0.0020   |
|          | 161              | D-Glucose 1-phosphate       | g1p_c    | 0.0019   |
| 50%      | 177              | L-Proline                   | pro-L_c  | 0.0019   |
|          | 181              | 3-Phospho-D-glycerate       | 3pg_c    | 0.0018   |
|          | 249              | D-Fructose 1,6-bisphosphate | fdp_c    | 0.0016   |
|          | 258              | L-Leucine                   | leu-L_c  | 0.0015   |

376  
 377 The priority list is led by L-glutamate, pyruvate, 2-oxoglutarate (not quantified),  
 378 D-fructose-6-P and glyceraldehyde 3-phosphate (not quantified). Both L-glutamate and  
 379 2-oxoglutarate participate in the assimilation of nitrogen in *E. coli*, where the former also  
 380 plays a role as nitrogen donor in the biosynthesis of nucleic acids (66). The latter along with  
 381 the rest (except for glyceraldehyde 3-phosphate), and acetyl-CoA are important biosynthetic  
 382 precursors used in modelling (49). Accordingly, other metabolites participating in central  
 383 pathways such as glycolysis (glyceraldehyde 3-phosphate, dihydroxyacetone phosphate, etc.)  
 384 and protein biosynthesis (amino acids) were also identified. Important metabolites  
 385 highlighted here agree with results from the seminal work by Wagner et al. (49), where they  
 386 used a smaller network (317 vs. 931 reactions). Due to computational costs, other attempts  
 387 specifically focusing on the constraining capacity with regards to TFA (Thermodynamics-  
 388 based Metabolite Sensitivity Analysis, TMSA) are also limited by the network size (156  
 389 reactions in (46)). In particular, this approach identified pyruvate as the most significant  
 390 metabolite in terms of reducing the variability in the thermodynamic properties of reactions,  
 391 and attributed it to its high connectivity in the network. Other important compounds included  
 392 phosphate, NAD<sup>+</sup>, NADH, CO<sub>2</sub>, menaquinol-8, menaquinone-8 and D-lactate. All but the



393 latter were classified as side compounds for this study (and therefore excluded), since the  
394 centrality measures are biased by ubiquitous metabolites (48).

395 The impact of the inherent dynamics (cell cycle and cell ageing) has been pointed out  
396 as a source of metabolic heterogeneity in clonal microbial populations (55). In a chemostat,  
397 cells are maintained at the exponential growth phase, but the cell cycle is not synchronised  
398 across single cells unless forced (56, 57). In *E. coli*, concentration values for NAD(P)H  
399 oscillate along the cell cycle (58), and ATP concentration values show an asymmetric  
400 distribution across single cells in a continuous culture (59). From a metabolomics point of  
401 view, an unbiased extraction and quantitation method is yet to be developed (60).  
402 Particularly, ATP/ADP/AMP quantitation require specific culture conditions (61), and  
403 nicotinamides parallel protocols to avoid degradation . Overall, the method developed here  
404 generated a priority list to be considered when selecting a metabolomics protocol aiming at  
405 providing data to further constrain a model in TFA.

406

#### 407 **Reaction directionalities in the central carbon metabolism**

408 Finally, flux pattern changes between *in vivo* and *in silico* fluxes in the central carbon  
409 metabolism were analysed, with a particular focus on the anaplerotic reactions. The  
410 ‘anaplerotic node’ (Fig. 2) consists of carboxylation/decarboxylation reactions including  
411 intermediates participating in the tricarboxylic acid (TCA) cycle that are used for  
412 biosynthesis of amino acids (67). Given the fact similar MIDs (from proteinogenic amino  
413 acids) can be obtained from different precursors, <sup>13</sup>C-MFA has been noted to show a limited  
414 capability to elucidate fluxes around the anaplerotic node (52, 68, 69). In order to evaluate  
415 changes in reaction directionalities, the available *in vivo* fluxes were tested against their  
416 equivalents in the simulated TFA flux distributions (S1 Table). Overall, 13/40 flux directions  
417 disagree between approaches (Table 6).

418

Predictive capabilities of thermodynamics-based stoichiometric approaches

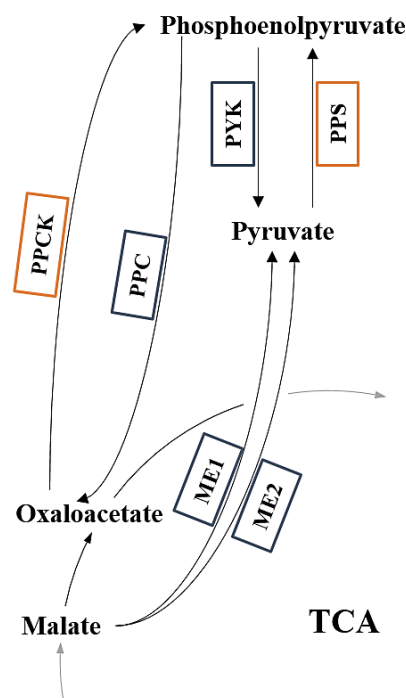

419

420 **Fig. 2. Anaplerotic node for *E. coli*.** Set of carboxylation/decarboxylation reactions including  
 421 phosphoenolpyruvate, pyruvate, oxaloacetate, and malate. Arrows indicate the expected direction of carbon  
 422 fluxes. Boxes refer to reactions: blue when they are defined in both the GSM and the metabolic network used  
 423 for  $^{13}\text{C}$ -MFA, and orange when they are exclusively considered in the GSM. In the latter case no mapping was  
 424 possible (S1 Table).

425 Discrepancies in flux pattern between methods are caused by both differences in the  
 426 structure of the metabolic networks and the way the problem is defined (Table 1). On the one  
 427 hand, *iJO1366* includes 8 reactions concerning the anaplerotic node and the glyoxylate shunt:  
 428 PPC and PPCK (between phosphoenolpyruvate and oxaloacetate), PYK and PPS (between  
 429 phosphoenolpyruvate and pyruvate), ME1 and ME2 (between pyruvate and malate) (Fig. 2),  
 430 and finally ICL and MALS (from isocitrate to malate, via glyoxylate). In contrast, the  
 431 metabolic network used for the  $^{13}\text{C}$ -MFA did not consider PPCK and PPS (S1 Table), which  
 432 could affect the determination of fluxes to/from phosphoenolpyruvate. Since  $^{13}\text{C}$ -MFA is  
 433 based on lumped reaction, branched pathways are not taken into account (13). Thus, having a  
 434 smaller range of alternative pathways than FBA/TFA may affect the estimation of flux  
 435 values.

436

437 **Table 6. Flux pattern changes between  $^{13}\text{C}$ -MFA data and matTFA predictions.**

| Reaction (GSM) | Definition (GSM)                                                 | Definition ( $^{13}\text{C}$ -MFA) | Direction ( $^{13}\text{C}$ -MFA) | Corrected direction ( $^{13}\text{C}$ -MFA) | Direction (TFA) |
|----------------|------------------------------------------------------------------|------------------------------------|-----------------------------------|---------------------------------------------|-----------------|
| ACALD          | acald_c + coa_c + nad_c $\leftrightarrow$ accoa_c + h_c + nadh_c | AcCoA $\rightarrow$ Ethanol        | +                                 | -                                           | 0               |

Predictive capabilities of thermodynamics-based stoichiometric approaches

|        |                                                                        |                                          |   |   |     |
|--------|------------------------------------------------------------------------|------------------------------------------|---|---|-----|
| ACKr   | $ac\_c + atp\_c + h\_c \leftrightarrow actp\_c + adp\_c$               | AcCoA $\rightarrow$ Acetate              | 0 | 0 | +   |
| ACONTb | $acon-C\_c + h2o\_c \rightleftharpoons icit\_c$                        | CIT $\rightarrow$ ICT                    | + | + | 0/+ |
| ALCD2x | $etoh\_c + nad\_c \leftrightarrow acald\_c + h\_c + nadh\_c$           | AcCoA $\rightarrow$ Ethanol              | + | - | +   |
| FBA    | $fdp\_c \leftrightarrow dhap\_c + g3p\_c$                              | F1,6P $\rightarrow$ DHAP + G3P           | + | + | 0/+ |
| ICL    | $icit\_c \rightarrow glx\_c + succ\_c$                                 | ICT $\rightarrow$ Glyoxylate + SUC       | + | + | 0   |
| ME1    | $mal-L\_c + nad\_c \rightarrow co2\_c + nadh\_c + pyr\_c$              | MAL $\rightarrow$ PYR + CO <sub>2</sub>  | + | + | 0   |
| ME2    | $mal-L\_c + nadp\_c \rightarrow co2\_c + nadph\_c + pyr\_c$            | MAL $\rightarrow$ PYR + CO <sub>2</sub>  | + | + | 0   |
| PFK    | $atp\_c + f6p\_c \rightleftharpoons adp\_c + fdp\_c$                   | F6P $\rightarrow$ F1,6P                  | + | + | 0/+ |
| PTAr   | $accoa\_c + h\_c + pi\_c \leftrightarrow actp\_c + coa\_c$             | AcCoA $\rightarrow$ Acetate              | 0 | 0 | -/0 |
| PYK    | $adp\_c + pep\_c \leftrightarrow atp\_c + pyr\_c$                      | PEP $\rightarrow$ PYR                    | + | + | 0/+ |
| SUCOAS | $atp\_c + coa\_c + succ\_c \leftrightarrow adp\_c + pi\_c + succoa\_c$ | 2-KG $\rightarrow$ SUC + CO <sub>2</sub> | + | + | -   |
| TALA   | $g3p\_c + s7p\_c \leftrightarrow e4p\_c + f6p\_c$                      | S7P + G3P $\leftrightarrow$ E4P + F6P    | + | + | -/0 |

438 Where +, flux in the forward direction; -, flux in the reverse direction; 0, no flux. *Corrected direction*, refers to  
 439 the adjustments due to differences in the definition of the reaction between <sup>13</sup>C-MFA and GSM (S1 Table). For  
 440 example the case of ALCD2x: *in vivo* flux (<sup>13</sup>C-MFA) suggests production of ethanol, whereas the *in silico* one  
 441 (GSM/TFA) predicts consumption of ethanol. Since reactions are defined in opposite directions, a correction  
 442 becomes necessary. Discrepancy between corrected directions and predicted ones allowed an automated  
 443 identification of flux pattern changes.

444 On the other hand, *in silico* flux distributions are the result of optimising the system  
 445 according to the chosen objective function. Accordingly, when maximising the biomass  
 446 production (which requires ATP), FBA and TFA promote pathways that reduce wasting ATP  
 447 in the optimal solution (14). For instance, PPCK (ATP-consuming reaction) carried no flux.  
 448 In contrast, experimental data from *E. coli* grown on glucose has proven that both PPC and  
 449 PPCK (which constitute a *futile cycle*) are active and play a role in metabolic regulations  
 450 (70). However, given the fact that ICL and ME1/ME2 do not generate any ATP, fluxes are  
 451 shut down in the simulated flux distributions (as shown in (52)). In this sense, it should be  
 452 noted that stochastic events or regulatory processes have been suggested to provoke a  
 453 variation of the fluxes through PPCK and ME1/ME2 (71). FBA/TFA also faced problems  
 454 regarding the overflow metabolism: acetate was predicted to be produced (PTAr and ACKr),  
 455 as opposed to the lack of flux according to <sup>13</sup>C-MFA.

456 Even though flux pattern changes between predicted and experimentally determined  
457 intracellular fluxes were present, TFA offered a reliable prediction of intracellular fluxes  
458 (Table 4). This overall consistency has been noted in the literature by comparing an array of  
459 different objective functions and constraints (based on split ratios rather than on mapping on  
460 a reaction-by-reaction case) (15). A combination of both approaches to overcome their  
461 limitations and different flux space solutions has also been suggested (72, 73). However,  
462 fluxes concerning the TCA cycle, the glyoxylate shunt and acetate secretion have proven to  
463 be difficult to predict (15), as also shown in this study. Similarly, other reactions are also  
464 affected by the substrate uptake rate: ALCD2x becomes unidirectional at high glucose levels  
465 (28).

466 In addition, the nonlinear dependency of the anaplerotic fluxes on the growth rate has  
467 been reported in the literature, limiting the reliability of conclusions from experiments using  
468 single dilution rates (70, 71). Particularly, metabolic fluxes through the aforementioned futile  
469 cycle are expected to be active under glucose-limited growth conditions (74), rather than  
470 being totally shut down (Fig. 2). In this sense, a higher degree of consistency between  
471 predicted and experimental flux distributions could have been achieved by (i) focusing on  
472 data from cultures with high dilution rates, so that futile cycle activity is lowered and the flux  
473 distribution becomes closer to the optimal solution, or (ii) applying further constraints to  
474 properly model the anaplerotic reactions (75). The first option is limited by the lack of  
475 published data at both the metabolomics and fluxomics levels from the same experiment, and  
476 the second one by the lack of implementation.

477 Consequently, it was assumed that the high correlation coefficient achieved for TFA  
478 against *in vivo* fluxomics data ( $r \approx 0.9$ ) was high enough to enable the analyses on the impact  
479 of varying the physicochemical parameters in the predictive capabilities. Studying flux  
480 pattern changes on a reaction-by-reaction basis also allowed to confirm previously reported  
481 limitations from both  $^{13}\text{C}$ -MFA and FBA/TFA with regards to the anaplerotic node (68, 69,  
482 75). Thus, metabolites in the node are expected to be directly affected.

483

484 **Conclusions**

485 This study showed that the predictive capabilities of TFA can be potentially improved by  
486 using physicochemical parameters closer to the experimental conditions and adequate  
487 equations. In addition, we proposed a method based on centrality measures to identify  
488 important metabolites allowing to further constrain the TFA. In contrast to previous attempts,  
489 our strategy is not limited by the size of the network and is computationally cheap. Therefore,  
490 a preliminary TFA could be considered when designing a metabolomics protocol to maximise  
491 the constraining power of the experimental concentration values. Overall, our study stressed  
492 the necessity of performing an in-depth assessment of available methods in the fluxomics  
493 field. For instance, interesting published potential solutions to known problems (e.g.  
494 elucidation of the anaplerotic fluxes) should be integrated with the widely used approaches.  
495 This should increase the degree of standardisation in the community, allowing to cross-  
496 validate novel strategies and improving the reliability of the simulated data.

497

498 **Acknowledgements**

499 This work was supported by the Biotechnology and Biological Sciences Research Council  
500 [BBSRC; Grant number BB/L013940/1] and the Engineering and Physical Sciences Research  
501 Council [EPSRC; Grant number BB/L013940/1]. We thank the University of Nottingham's  
502 School of Life Sciences for supporting the PhD studentship of CTA and Nicole Percy for  
503 her helpful comments.

## 504 **References**

- 505 1. Stephanopoulos G, Alper H, Moxley J. Exploiting biological complexity for strain  
506 improvement through systems biology. *Nat Biotechnol.* 2004;22(10):1261-7.
- 507 2. Kell DB, Oliver SG. Here is the evidence, now what is the hypothesis? The  
508 complementary roles of inductive and hypothesis-driven science in the post-genomic era.  
509 *BioEssays.* 2003;26:99-105.
- 510 3. Dai Z, Nielsen J. Advancing metabolic engineering through systems biology of  
511 industrial microorganisms. *Curr Opin Biotechnol.* 2015;36:8-15.
- 512 4. Park JH, Lee SY, Kim TY, Kim HU. Application of systems biology for bioprocess  
513 development. *Trends Biotechnol.* 2008;26(8):404-12.
- 514 5. Toya Y, Shimizu H. Flux analysis and metabolomics for systematic metabolic  
515 engineering of microorganisms. *Biotechnol Adv.* 2013;31(6):818-26.
- 516 6. Kim DH, Achcar F, Breitling R, Burgess KE, Barrett MP. LC-MS-based absolute  
517 metabolite quantification: application to metabolic flux measurement in trypanosomes.  
518 *Metabolomics.* 2015;11(6):1721-32.
- 519 7. Cortassa S, Caceres V, Bell LN, O'Rourke B, Paolocci N, Aon MA. From  
520 metabolomics to fluxomics: a computational procedure to translate metabolite profiles  
521 into metabolic fluxes. *Biophysical Journal.* 2015;108(1):163-72.
- 522 8. van Eunen K, Kiewiet JAL, Westerhoff HV, Bakker BM. Testing Biochemistry  
523 Revisited: How In Vivo Metabolism Can Be Understood from In Vitro Enzyme Kinetics.  
524 *PLoS Comput Biol.* 2012;8(4).
- 525 9. Tomar N, De RK. Comparing methods for metabolic network analysis and an  
526 application to metabolic engineering. *Gene.* 2013;521(1):1-14.
- 527 10. Zanghellini J, Ruckerbauer D, Hanscho M, Jungreuthmayer C. Elementary flux  
528 modes in a nutshell: Properties, calculation and applications. *Biotechnol J.* 2013;8:1009-  
529 16.
- 530 11. Jol S, Kummel A, Terzer M, Stelling J, Heinemann M. System-Level Insights into  
531 Yeast Metabolism by Thermodynamic Analysis of Elementary Flux Modes. *PLoS Comput*  
532 *Biol.* 2012;8(3).
- 533 12. Feist AM, Herrgard MJ, Thiele I, Reed JL, Palsson BO. Reconstruction of  
534 biochemical networks in microorganisms. *Nat Rev Microbiol.* 2009;7(2):129-43.
- 535 13. Antoniewicz MR. Methods and advances in metabolic flux analysis: a mini-review.  
536 *J Ind Microbiol Biotechnol.* 2015;42(3):317-25.
- 537 14. Orth JD, Thiele I, Palsson BO. What is flux balance analysis? *Nat Biotechnol.*  
538 2010;28(3):245-8.
- 539 15. Schuetz R, Kuepfer L, Sauer U. Systematic evaluation of objective functions for  
540 predicting intracellular fluxes in *Escherichia coli*. *Molecular Systems Biology.*  
541 2007;3(119).
- 542 16. Schuetz R, Zamboni N, Zampieri M, Heinemann M, Sauer M. Multidimensional  
543 optimality of microbial metabolism. *Science.* 2012;336:601-4.
- 544 17. Long CP, Antoniewicz MR. High-resolution <sup>13</sup>C metabolic flux analysis. *Nat Protoc.*  
545 2019;14:2856-77.
- 546 18. Wiechert W, Noh K. Isotopically non-stationary metabolic flux analysis: complex  
547 yet highly informative. *Curr Opin Biotechnol.* 2013;24(6):979-86.
- 548 19. Vojinović V, Von Stockar U. Influence of uncertainties in pH, pMg, activity  
549 coefficients, metabolite concentrations, and other factors on the analysis of the  
550 thermodynamic feasibility of metabolic pathways. *Biotechnol Bioeng.* 2009;103(4):780-  
551 95.
- 552 20. Salvy P, Fengos G, Ataman M, Pathier T, Soh KC, Hatzimanikatis V. pyTFA and  
553 matTFA a Python package and a Matlab toolbox for Thermodynamics-based Flux  
554 Analysis. *Bioinformatics.* 2018;35(1):167-9.
- 555 21. Hoppe A, Hoffmann S, Holzhütter H-G. Including metabolite concentrations into  
556 flux balance analysis: thermodynamic realizability as a constraint on flux distributions in  
557 metabolic networks. *BMC Syst Biol.* 2007;1(23).

Predictive capabilities of thermodynamics-based stoichiometric approaches

- 558 22. Park JO, Rubin SA, Xu YF, Amador-Noguez D, Fan J, Shlomi T, et al. Metabolite  
559 concentrations, fluxes and free energies imply efficient enzyme usage. *Nat Chem Biol.*  
560 2016;12.
- 561 23. Ataman M, Hatzimanikatis V. Heading in the right direction: thermodynamics-  
562 based network analysis and pathway engineering. *Curr Opin Biotechnol.* 2015;36:176-  
563 82.
- 564 24. Beard DA, Babson E, Curtis E, Qian H. Thermodynamic constraints for biochemical  
565 networks. *J Theor Biol.* 2004;228:327-33.
- 566 25. Kümmel A, Panke S, Heinemann M. Putative regulatory sites unraveled by  
567 network-embedded thermodynamic analysis of metabolome data. *Mol Syst Biol.* 2006.
- 568 26. Flamholz A, Noor E, Bar-Even A, Milo R. eQuilibrator - the biochemical  
569 thermodynamics calculator. *Nucleic Acids Res.* 2012;40:D770-D5.
- 570 27. Henry CS, Broadbelt LJ, Hatzimanikatis V. Thermodynamics-Based Metabolic Flux  
571 Analysis. *Biophys J.* 2007;92:1792-805.
- 572 28. Niebel B, Leupold S, Heinemann M. An upper limit on Gibbs energy dissipation  
573 governs cellular metabolism. *Nat Metab.* 2019;1:125-32.
- 574 29. Fleming RM, Thiele I. von Bertalanffy 1.0: a COBRA toolbox extension to  
575 thermodynamically constrain metabolic models. *Bioinformatics.* 2011;27(1):142-3.
- 576 30. Gerstl M, Jungreuthmayer C, Zanghellini J. tEFMA: computing thermodynamically  
577 feasible elementary flux modes in metabolic networks. *Bioinformatics.*  
578 2015;31(13):2232-4.
- 579 31. Simonin J-P. Thermodynamic consistency in the modeling of speciation in  
580 selfcomplexing electrolytes. *Ind Eng Chem Res.* 2017;56:9721-33.
- 581 32. Alberty RA. *Thermodynamics of Biochemical Reactions*: John Wiley & Sons; 2005.
- 582 33. Jankowski K, Henry CS, Broadbelt LJ, Hatzimanikatis V. Group contribution  
583 method for thermodynamic analysis of complex metabolic networks. *Biophys J.*  
584 2008;95:1487-99.
- 585 34. Orth JD, Conrad TM, Na J, Lerman JA, Nam H, Feist AM, et al. A comprehensive  
586 genome-scale reconstruction of *Escherichia coli* metabolism—2011. *Mol Syst Biol.*  
587 2011;7(535).
- 588 35. Ishii N, Nakahigashi K, Baba T, Robert M, Soga T, Kanai A, et al. Multiple high-  
589 throughput analyses monitor the response of *E.coli* to perturbations. *Science.*  
590 2007;316(5824):593-7.
- 591 36. Sandve GK, Nekrutenko A, Taylor J, Hovig E. Ten Simple Rules for Reproducible  
592 Computational Research. *PLoS Comput Biol.* 2013;9(10).
- 593 37. Schellenberger J, Que R, Fleming RM, Thiele I, Orth JD, Feist AM, et al.  
594 Quantitative prediction of cellular metabolism with constraint-based models: the COBRA  
595 Toolbox v2.0. *Nat Protoc.* 2011;6(9):1290-307.
- 596 38. Atkins P, Paula Jd. *Equilibrium electrochemistry*. *Atkins' physical chemistry*. 7th  
597 ed. United States: Oxford University Press; 2002.
- 598 39. Fleming RM, Thiele I, Nasheuer HP. Quantitative assignment of reaction  
599 directionality in constraint-based models of metabolism: Application to *Escherichia coli*.  
600 *Biophys Chem.* 2009;145:47-56.
- 601 40. Siedler G, Peters H. Physical properties (general) of sea water. *Oceanography.*  
602 *Landolt-Börnstein: Numerical data and functional relationships in science and*  
603 *technology*. V/3a. Berlin: Springer; 1986. p. 233-64.
- 604 41. Meissner T, Wentz FJ. The complex dielectric constant of pure and sea water from  
605 microwave satellite observations. *IEEE T Geosci Remote.* 2004;42(9):1836-49.
- 606 42. Millero FJ, Leung WH. Thermodynamics of seawater at one atmosphere. *Am J Sci.*  
607 1976;276:1035-77.
- 608 43. Baldwin WW, Myer R, Powell N, Anderson E, Koch AL. Buoyant density of  
609 *Escherichia coli* is determined solely by the osmolarity of the culture medium. *Arch*  
610 *Microbiol.* 1995;164:155-7.
- 611 44. Pandey V, Hadadi N, Hatzimanikatis V. Enhanced flux prediction by integrating  
612 relative expression and relative metabolite abundance into thermodynamically consistent  
613 metabolic models. *PLoS Comput Biol.* 2019;15(5).
- 614 45. Field A. *Discovering statistic using SPSS*. 3rd ed: SAGE Publications; 2009.

Predictive capabilities of thermodynamics-based stoichiometric approaches

- 615 46. Kiparissides A, Hatzimanikatis V. Thermodynamics-based Metabolite Sensitivity  
616 Analysis in metabolic networks. *Metab Eng.* 2017;39:117-27.
- 617 47. Page L B, Motwani R W. The PageRank Citation Ranking: Bringing Order to the  
618 Web. In: InfoLab S, editor. Stanford, CA, USA1998.
- 619 48. Frainay C, Aros S, Chazalviel M, Garcia T, Vinson F, Weiss N, et al. MetaboRank:  
620 network-based recommendation system to interpret and enrich metabolomics results.  
621 *Bioinformatics.* 2018;35(2):274–83.
- 622 49. Wagner A, Fell D. The small world inside large metabolic networks. *Proc Biol Sci.*  
623 2001;268:1803-10.
- 624 50. Beguerisse-Díaz M, Bosque G, Oyarzún D, Picó J, Barahona M. Flux-dependent  
625 graphs for metabolic networks. *NPJ Syst Biol Appl.* 2018;4(32).
- 626 51. Cordova LT, Cipolla RM, Swarup A, Long CP, Antoniewicz MR. <sup>13</sup>C metabolic flux  
627 analysis of three divergent extremely thermophilic bacteria: *Geobacillus* sp. LC300,  
628 *Thermus thermophilus* HB8, and *Rhodothermus marinus* DSM 4252. *Metab Eng.*  
629 2017;44:182-90.
- 630 52. Toya Y, Ishii N, Nakahigashi K, Hirasawa T, Soga T, Tomita M, et al. <sup>13</sup>C-  
631 metabolic flux analysis for batch culture of *Escherichia coli* and its *pyk* and *pgi* gene  
632 knockout mutants based on mass isotopomer distribution of intracellular metabolites.  
633 *Biotechnol Prog.* 2010;26(4):975-92.
- 634 53. Costenoble R, Muller D, Barl T, van Gulik WM, van Winden WA, Reuss M, et al.  
635 <sup>13</sup>C-Labeled metabolic flux analysis of a fed-batch culture of elutriated *Saccharomyces*  
636 *cerevisiae*. *FEMS Yeast Res.* 2007;7(4):511-26.
- 637 54. Ralser M. An appeal to magic? The discovery of a non-enzymatic metabolism and  
638 its role in the origins of life. *Biochem J.* 2018;475:2577-92.
- 639 55. Takhaveev V, Heinemann M. Metabolic heterogeneity in clonal microbial  
640 populations. *Curr Opin Microbiol.* 2018;45:30-8.
- 641 56. Goodwin BC. Synchronization of *Escherichia coli* in a chemostat by periodic  
642 phosphate feeding. *Eur J Biochem.* 1969;10:511-4.
- 643 57. Massie TM, Blasius B, Weithoff G, Gaedke U, Fussmann GF. Cycles, phase  
644 synchronization, and entrainment in single-species phytoplankton populations. *P Natl*  
645 *Acad Sci USA.* 2010;107(9):4236-41.
- 646 58. Zhang Z, Miliadis-Argeitis A, Heinemann M. Dynamic single-cell NAD(P)H  
647 measurement reveals oscillatory metabolism throughout the *E. coli* cell division cycle. *Sci*  
648 *Rep.* 2018;8(2162).
- 649 59. Yaginuma H, Kawai S, Tabata KV, Tomiyama K, Kakizuka A, Komatsuzaki T, et al.  
650 Diversity in ATP concentrations in a single bacterial cell population revealed by  
651 quantitative single-cell imaging. *Sci Rep.* 2014;4(6522).
- 652 60. Gao P, Xu G. Mass-spectrometry-based microbial metabolomics: recent  
653 developments and applications. *Anal Bioanal Chem.* 2015;407(3):669-80.
- 654 61. Rabinowitz JD, Kimball E. Acidic Acetonitrile for Cellular Metabolome Extraction  
655 from *Escherichia coli*. *Anal Chem.* 2007;79:6167-73.
- 656 62. Lu W, Wang L, Chen L, Hui S, Rabinowitz JD. Extraction and Quantitation of  
657 Nicotinamide adenine dinucleotide redox cofactors. *Antioxidants & redox signaling.*  
658 2018;28(3):167-79.
- 659 63. Barber F, Ho P-Y, Murray AW, Amir A. Details matter: noise and model structure  
660 set the relationship between cell size and cell cycle timing. *Front Cell Dev Biol.*  
661 2017;5(92).
- 662 64. Crosby JR, Laemthong T, Lewis AM, Straub CT, Adams MW, Kelly RM. Extreme  
663 thermophiles as emerging metabolic engineering platforms. *Curr Opin Biotechnol.*  
664 2019;59:55-64.
- 665 65. Dun B, Zhang Z, Grubner S, Yurkovich J, Palsson B, Zielinski D. Temperature-  
666 Dependent Estimation of Gibbs Energies Using an Updated Group-Contribution Method.  
667 *Biophys J.* 2018;114:2691–702.
- 668 66. van Heeswijk W, V. Westerhoff H, Boogerd F. Nitrogen Assimilation in *Escherichia*  
669 *coli*: Putting Molecular Data into a Systems Perspective. *Microbiol Mol Biol Rev.*  
670 2013;77(4):628–95.



Predictive capabilities of thermodynamics-based stoichiometric approaches

- 671 67. Sauer U, Eikmanns BJ. The PEP-pyruvate-oxaloacetate node as the switch point  
672 for carbon flux distribution in bacteria. *FEMS Microbiol Rev.* 2005;29:765-94.
- 673 68. Kappelmann J, Wiechert W, Noack S. Cutting the Gordian Knot: Identifiability of  
674 anaplerotic reactions in *Corynebacterium glutamicum* by means of (13) C-metabolic flux  
675 analysis. *Biotechnol Bioeng.* 2015;113(3).
- 676 69. Fischer E, Zamboni N, Sauer U. High-throughput metabolic flux analysis based on  
677 gas chromatography-mass spectrometry derived 13C constraints. *Anal Biochem.*  
678 2004;325(2):308-16.
- 679 70. Yang C, Hua Q, Baba T, Mori H, Shimizu K. Analysis of *Escherichia coli* anaplerotic  
680 metabolism and its regulation mechanisms from the metabolic responses to altered  
681 dilution rates and phosphoenolpyruvate carboxykinase knockout. *Biotechnol Bioeng.*  
682 2003;84(2):129-44.
- 683 71. Nanchen A, Schicker A, Sauer U. Nonlinear dependency of intracellular fluxes on  
684 growth rate in miniaturized continuous cultures of *Escherichia coli*. *Appl Environ Microb.*  
685 2006;72(2):1164-72.
- 686 72. Williams TCR, Poolman MG, Howden AJM, Schwarzlander M, Fell DA, Ratcliffe RG,  
687 et al. A genome-scale metabolic model accurately predicts fluxes in central carbon  
688 metabolism under stress conditions. *Plant Physiol.* 2010;154:311-23.
- 689 73. Chen X, Alonso AP, Allen DK, Reed JL, Shachar-Hill Y. Synergy between (13)C-  
690 metabolic flux analysis and flux balance analysis for understanding metabolic adaptation  
691 to anaerobiosis in *E. coli*. *Metab Eng.* 2011;13(1):38-48.
- 692 74. Sauer U, Lasko DR, Fiaux J, Hochuli M, Glaser R, Szyperski T, et al. Metabolic flux  
693 ratio analysis of genetic and environmental modulations of *Escherichia coli* central  
694 carbon metabolism. *J Bacteriol.* 1999;181(21):6679-88.
- 695 75. Myoung Park J, Yong Kim T, Yup Lee S. Prediction of metabolic fluxes by  
696 incorporating genomic context and flux-converging pattern analyses. *P Natl Acad Sci*  
697 *USA.* 2010;107(33):14931-6.
- 698
- 699

700 **Author contributions**

701

702 **Conceptualisation:** Claudio Tomi-Andrino, Thomas Millat, Dong-Hyun Kim

703 **Data curation:** Claudio Tomi-Andrino

704 **Formal analysis:** Claudio Tomi-Andrino

705 **Methodology:** Claudio Tomi-Andrino, Rupert Norman, Thomas Millat, Philippe Soucaille

706 **Project administration:** Claudio Tomi-Andrino

707 **Resources:** Klaus Winzer, David A. Barrett, John King, Dong-Hyun Kim

708 **Software:** Claudio Tomi-Andrino, Rupert Norman, Thomas Millat

709 **Supervision:** Klaus Winzer, David A. Barrett, John King, Dong-Hyun Kim

710 **Writing – original draft:** Claudio Tomi-Andrino

711 **Writing – review & editing:** Claudio Tomi-Andrino, Rupert Norman, Thomas Millat,

712 Philippe Soucaille, Klaus Winzer, David A. Barrett, John King, Dong-Hyun Kim

713

714 **Supporting information**

715

716 **S1 Appendix.** Generation of directed graphs and side compounds.

717 **S1 Dataset.** Metabolomics Keio database.

718 **S2 Dataset.** Variation of flux values among tests.

719 **S3 Dataset.** Variation of concentration values among tests.

720 **S4 Dataset.** PageRank scores.

721 **S1 Table.** Mapping of metabolic fluxes.

722 **S2 Table.** List of files used in this study.

723 **S3 Table.** Full factorial design.

724 **S4 Table.** Tests characterisation and ranking.

725

726
